# 1 Developmentally-orchestrated mitochondrial processes prime 2 the selection against harmful mtDNA mutations

3  
4 Zhe Chen<sup>1,4</sup>, Zong-Heng Wang<sup>1,4</sup>, Guofeng Zhang<sup>2</sup>, Christopher K. E. Bleck<sup>1</sup>, Dillon J. Chung<sup>1</sup>,  
5 Grey Madison<sup>1</sup>, Eric Lindberg<sup>1</sup>, Christian Combs<sup>1</sup>, Robert S. Balaban<sup>1</sup> and Hong Xu<sup>1,3</sup>

6  
7 <sup>1</sup> National Heart, Lung, and Blood Institute, National Institutes of Health, Bethesda, MD 20892

8 <sup>2</sup> National Institute of Biomedical Imaging and Bioengineering, National Institutes of Health, Bethesda, MD 20892

9 <sup>3</sup> Correspondence to: [hong.xu@nih.gov](mailto:hong.xu@nih.gov)

10 <sup>4</sup>These authors contributed equally to this work

## 11 12 13 Abstract

14  
15 Although mitochondrial DNA (mtDNA) is prone to mutation and not all conventional DNA repair  
16 systems operate in mitochondria, deleterious mutations are exceedingly rare. How the  
17 transmission of detrimental mtDNA mutations is restricted through the maternal lineage is  
18 debated. Here, we use *Drosophila* to dissect the mechanisms of mtDNA selective inheritance  
19 and understand their molecular underpinnings. Our observations support a purifying selection  
20 at the organelle level based on a series of developmentally-orchestrated mitochondrial  
21 processes. We demonstrate that mitochondrial fission, together with the lack of mtDNA  
22 replication in early germlinum, effectively segregates mtDNA into individual organelles. After  
23 mtDNA segregation, mtDNA transcription begins, which leads to the activation of respiration in  
24 each organelle. The expression of mtDNA-encoded genes allows the functional manifestation of  
25 different mitochondrial genotypes in heteroplasmic cells, and hence functions as a stress test  
26 for each individual genome and sets the stage for the replication competition. We also show  
27 that the Balbiani body has a minor role in mtDNA selective inheritance by supplying healthy  
28 mitochondria to the pole plasm. The two selection mechanisms may act synergistically to  
29 secure the transmission of functional mtDNA through *Drosophila* oogenesis.  
30

## 1 Introduction

2 Mitochondria, the indispensable power plants of eukaryotic cells, present geneticists with a  
3 fundamental paradox. Their genome accumulates mutations at a high rate in the soma,  
4 estimated to be two orders of magnitude higher than that of the nuclear genome (Wallace and  
5 Chalkia, 2013). This rate owes to both the abundance of highly-mutagenic free radicals  
6 generated by respiration and the lack of effective DNA repair *via* homologous recombination in  
7 the mitochondrial matrix (Taylor and Turnbull, 2005). If freely transmitted, the damaging  
8 mutations would gradually accumulate over generations, which could severely impair the  
9 fitness of organisms and even lead to their extinction (Felsenstein, 1974). However, damaging  
10 mtDNA mutations are exceedingly rare in populations. This paradox underscores the existence  
11 of effective mechanisms that restrict the transmission of deleterious mtDNA mutations and  
12 favor the selective inheritance of healthy mitochondrial genomes. Since mtDNA is  
13 predominantly transmitted through the maternal lineage, these mechanisms must operate in  
14 the female germline.

15 Currently, the dominant dogma, bottleneck inheritance proposes that only a small fraction of  
16 the mitochondrial genomes present in primordial germ cells are transmitted to an oocyte and  
17 eventually populate the offspring. This process explains the rapid genetic drift of mitochondrial  
18 genotypes between generations (Hauswirth and Laipis, 1982; Olivo et al., 1983; Rebolledo-  
19 Jaramillo et al., 2014). Bottleneck inheritance could also indirectly lead to the counterselection  
20 of deleterious mtDNA mutations: different mtDNA compositions would generate different  
21 metabolic outputs in developing oocytes, eventually causing the elimination of oocytes  
22 harboring an excess of deleterious mutations (Jenuth et al., 1996). However, the frequency of  
23 spontaneous mtDNA mutations is about  $10^{-5}$ - $10^{-6}$  (Cree et al., 2008), which, while high  
24 compared to the frequency of nuclear DNA mutations, remains too low to elicit the kind of  
25 biochemical deficiency required for an effective selection at the whole-cell level. In fact,  
26 deleterious mtDNA mutations are prevented from passing to the next generation even when  
27 present in low copy-number in mouse models (Fan et al., 2008; Stewart et al., 2008b),  
28 underscoring the existence of a selection that likely occurs at the level of individual organelles  
29 or genomes, besides the model of bottleneck inheritance.

30 Our work in *Drosophila melanogaster* (*Dm*) has shown that selective inheritance of mtDNA also  
31 takes place in insects (Hill et al., 2014). Taking advantage of a temperature-sensitive deleterious  
32 mtDNA mutation (*mt:Col<sup>T300I</sup>*, referred to as *ts*) that we had previously engineered (Hill et al.,  
33 2014), we found that the load of *ts* allele in the progeny of heteroplasmic mothers (carrying  
34 both wild-type and *ts* mtDNAs) was greatly reduced at restrictive temperature (Hill et al., 2014).  
35 This observation suggested that the *Dm* female germline could detect the defect caused by the  
36 *ts* allele at restrictive temperature, and limit its transmission. Genetic and developmental  
37 analyses roughly mapped selective mtDNA inheritance in *Dm* to a developmental window  
38 spanning the late germarium (region 2B) and early stages of egg chamber (Hill et al., 2014; Ma  
39 et al., 2014). This is a stage where groups of 16 sister cells (16-cell cysts), derived from the four  
40 successive divisions of single oocyte precursors, organize into egg chambers from which a single  
41 egg will emerge (Spradling, 1993). Interestingly, this is also the stage when mtDNA replication

1 resumes, after having been largely quiescent in the earlier dividing cysts and region 2A (Hill et  
2 al., 2014). mtDNA replication in this region appears to depend on active mitochondrial  
3 respiration, as both pharmacological inhibition and genetic disruption of nuclear-encoded  
4 electron-transport chain (ETC) subunits severely impair mtDNA replication (Hill et al., 2014).  
5 The *ts* mutation, which disrupts a subunit of the mitochondria-encoded ETC complex IV, also  
6 leads to greatly diminished mtDNA replication in homoplasmic germaria that carry only the  
7 mtDNA *ts* allele under restrictive temperature (Hill et al., 2014). We reasoned that in  
8 heteroplasmic germ cells, healthy mitochondria carrying wild-type mtDNA would replicate their  
9 DNA and propagate much more vigorously than defective ones harboring mutations that impair  
10 respiration, which would consequently reduce the proportion of mutant mtDNA in the progeny.  
11 This reasoning led us to propose a replication-competition model for selective inheritance in  
12 *Dm* (Hill et al., 2014).

13 While logically compelling, the replication-competition model rests on the assumption that  
14 germ cells can discern the integrity of individual mitochondrial genomes, presumably based on  
15 their functionally distinct protein products. However, mitochondria are not stationary: they  
16 undergo constant fusion and fission, which mixes and reassorts mitochondrial genomes and  
17 their products (Frank et al., 2001; Ishihara et al., 2006; Legros et al., 2004). In heteroplasmic  
18 cells, mitochondrial fusion allows mtDNA complementation to maintain the overall metabolic  
19 output in spite of significant levels of mtDNA mutations (Chan, 2006). This process could  
20 therefore mask the functional deficiency caused by deleterious mutations, and prevent the  
21 elimination of defective genomes. Therefore, we propose that mitochondrial genomes have to  
22 be effectively segregated, and then expressed, for replication-competition to be effective in  
23 selective mtDNA inheritance. However, currently, it is not clear whether and how mtDNA  
24 segregation and expression are regulated during oogenesis, nor do we know how such  
25 regulation impacts mtDNA transmission and selective inheritance.

26 Aside from replication-competition and bottleneck inheritance, another mechanism has also  
27 been proposed, based on the observed localization and transport of mitochondria to the  
28 prospective germ plasm during oogenesis (Cox and Spradling, 2003). At the beginning of oocyte  
29 differentiation, a fraction of mitochondria and other organelles congregate within a structure  
30 called the Balbiani body, which supplies mitochondria to the pole plasm of the mature oocyte,  
31 the cytoplasm of the future embryo's primordial germ cells. It has been proposed that healthy  
32 mitochondria might be enriched in the Balbiani body and preferentially transmitted to  
33 grandchildren (Cox and Spradling, 2003). However, this idea still lacks direct experimental  
34 support. Since we have shown that selective inheritance was detectable as early as in the  
35 offspring of heteroplasmic mothers, not just in their grandchildren, this mechanism could not  
36 alone explain selective inheritance. Nevertheless, it might be an important contributor.

37 In this paper, we test the basic assumptions of our replication-competition model by  
38 documenting the behavior of mitochondria and their genomes in the developing *Dm* ovary. In  
39 addition, we examine the potential contribution of mitochondrial aggregation around the  
40 Balbiani body to selective mtDNA inheritance in *Dm*.

41

## 1 Results

### 3 Mitochondrial morphological change in *Dm* early germarium

4 Using optical microscopy, previous studies have demonstrated that mitochondria were more  
5 rounded and fragmented in dividing cysts compared to germline stem cells (GSCs) in *Dm*  
6 germarium region 1 (Cox and Spradling, 2003; Lieber et al., 2019), suggesting that mitochondria  
7 undergo increased fission or decreased fusion in germline cysts. To comprehensively analyze  
8 mitochondrial size and shape in germarium, we used focused ion beam scanning electron  
9 microscopy (FIB-SEM) to reconstruct a 3D volume of *Drosophila* germarium at an isotropic  
10 resolution of  $10 \times 10 \times 10 \text{ nm}^3$  voxels (Videos, 1 and 2). We then applied the computational  
11 segmentation to trace all mitochondria in germ cells. Overall, mitochondria displayed a wide  
12 spectrum of morphology, ranging from small spheres and short tubules to elongated tubules in  
13 germarium (Fig. 1A and B). The mitochondrial volume appeared to be gradually decreased  
14 during cyst division (Fig. S1 A). In a 2-cell cyst at region 1, 47.9% of the mitochondria were  
15 larger than  $0.05 \mu\text{m}^3$  (Fig. 1 E). After the completion of cyst division, the fraction of large  
16 mitochondria ( $>0.05 \mu\text{m}^3$ ) decreased to 18.8% in a 16-cell cyst at region 2A (Fig. 1 E).  
17 Reciprocally, the fraction of small mitochondria ( $<0.03 \mu\text{m}^3$ ) increased to 63.5%, compared with  
18 37.5% in region 1 (Fig. 1 C, Table S1). We plotted the volume against the surface area of each  
19 individual mitochondrion to evaluate the geometric shape of mitochondria (Harris and Theriot,  
20 2018) (Fig. S1 B and C). In region 1, two populations of mitochondria were observed (Fig. S1 B).  
21 One group of mitochondria were spherical, while others were more elongated. In region 2A,  
22 more mitochondria shifted toward spheroid morphology (Fig. S1 C). These observations, taken  
23 together, suggest that elongated, large mitochondria undergo fragmentation in dividing cysts in  
24 region 1, and become smaller spheroids in 16-cell cyst region 2A.

26 To confirm this observation, we assessed mitochondrial morphology in germarium expressing  
27 dsRNA against *Fis1*, a mitochondrial outer membrane protein that promotes mitochondria  
28 fission (Stojanovski et al., 2004). *Fis1* RNAi was activated by a *bam-gal4* driver that expresses in  
29 dividing cysts specifically (Chen and McKearin, 2003) (Fig. S2 A). There were more large  
30 mitochondria ( $>0.05 \mu\text{m}^3$ ), and correspondingly, less small mitochondria ( $0.01\text{-}0.03 \mu\text{m}^3$ ) in  
31 region 2A compared to the control (Fig. 1 D). The results indicate that *Fis1* knockdown can  
32 effectively impede mitochondrial fragmentation in early germarium.

### 34 Mitochondrial genomes are segregated in region 2A of the *Drosophila* germarium

35 We reasoned that the lack of mtDNA replication in region 2A (Hill et al., 2014), in conjunction  
36 with mitochondria fragmentation would facilitate mitochondria genome segregation. To test  
37 this idea, we visualized mtDNA and their distribution in the mitochondrial network in  
38 germarium. Mitochondrial transcription factor A (TFAM) is the major mtDNA packaging protein  
39 and a well-established marker for mtDNA nucleoids (Alam et al., 2003). We thus used  
40 stimulated emission depletion (STED) microscopy to image both mitochondria and TFAM-GFP  
41 (Zhang et al., 2016), to assess mtDNA segregation (Fig. 2 A). Mitochondria that were labelled by  
42 ATP synthase  $\alpha$  subunit (ATPs) staining were more elongated and interconnected in stem cells  
43 or cystoblasts at region 1, whereas became more rounded in region 2A (Fig. 2 A and B). This

1 result further substantiates that mitochondria undergo fragmentation in early germarium as  
2 observed in the FIB-SEM analysis. The TFAM-GFP signal showed as many puncta throughout the  
3 germarium and localized to mitochondria. We noticed that the ATPs staining was not always  
4 uniform along the mitochondrial network, which might reflect the uneven density of cristae,  
5 where the ATP synthase locates, in different mitochondria. Sometimes, even within a single  
6 mitochondrion, ATPs staining appeared as multiple puncta, and nucleoids were located in  
7 regions with low ATPs intensity (Fig. 2 B). This phenomenon is in line with a recent super-  
8 resolution microscopic study showing a lack of cristae structures surrounding nucleoids  
9 (Stephan et al., 2019).

10  
11 We next quantified the number of nucleoids in each mitochondrion. In the anterior end of  
12 region 1, where stem cells and cystoblasts reside, the number of mitochondrial nucleoids,  
13 indicated as the TFAM-GFP puncta, ranged from zero to four in different mitochondria (Fig. 2 C).  
14 As expected, large and elongated mitochondria often contained more than one nucleoids,  
15 whereas some small mitochondria that might be the intermediate structures of mitochondrial  
16 fusion and fission processes, were devoid of TFAM-GFP signal (Fig. 2 B). Among TFAM-GFP  
17 positive mitochondria, 40.4%, 36% 17.4% and 6.2% of them contained 1, 2, 3 and 4 nucleoids,  
18 respectively (Fig. 2 C). In region 2A, 73.9% of the mitochondria contained only 1 nucleoid (Fig. 2  
19 C), indicating that through the mitochondrial fragmentation, nucleoids are effectively  
20 segregated in 16-cell cysts at region 2A before the onset of mtDNA replication in germarium  
21 region 2B.

22  
23 It has been estimated that a single nucleoid may contain 1 to 10 copies of mtDNA (Kukat et al.,  
24 2011; Legros et al., 2004; Satoh and Kuroiwa, 1991). Although mtDNA in separate nucleoids do  
25 not intermix (Gilkerson et al., 2008), those within a nucleoid can functionally complement each  
26 other, which could interfere with selective inheritance (Hill et al., 2014). Currently, there is no  
27 reliable technique to accurately quantify mtDNA copy number within a specific nucleoid. We  
28 considered using TFAM-GFP intensity as a measure for mtDNA copy number in a nucleoid.  
29 However the values of TFAM-GFP intensities in different nucleoids appeared to be random and  
30 continuous, instead of quantized. Therefore, the TFAM-GFP intensity is not only determined by  
31 the mtDNA copy number, but could also affected by the compaction state of mtDNA (Kukat et  
32 al., 2011). Nonetheless, one could approximate mtDNA copy number per nucleoid by  
33 normalizing the total number of mitochondrial genomes to the number of nucleoids in a cell. To  
34 this end, we isolated germ cells by Fluorescence Activated Cell Sorting from the ovary of white  
35 pupae expressing Vasa-GFP, a reporter specific to germ cells (Fig. S3 A). At this stage, oogenesis  
36 has progressed to region 1 of the germarium, which consists mainly of germline stem cells  
37 (GSCs) and cystoblasts (Song et al., 2007). We quantified the mtDNA copy number to be ~108  
38 copies in GSCs and early cysts (Figure 2D). We also quantified the mtDNA copy number in a  
39 female germline stem cell culture (fGS) established from *Drosophila* adult ovaries (Niki et al.,  
40 2006). We estimated there were about 120 copies of mtDNA per fGS cell (Fig. S3 B), which is  
41 close to the value obtained from germ cells in early pupae ovaries. Since there were  
42 approximately 80 nucleoids in GSCs (Fig. 2 D), we deduced that each nucleoid contained 1.36  
43 copies of mtDNA on average. This number suggests that intra-nucleoid complementation is  
44 rather minimal at this stage. In addition, given that there is no mtDNA replication until region

1 2B (Hill et al., 2014), the mtDNA copy number within a nucleoid should not increase prior to the  
2 stage when selective inheritance occurs. Taken together, our observations indicate that mtDNA  
3 molecules are effectively sorted into different organelles during the early stages of ovarian  
4 development.

5

#### 6 **Mitochondrial fragmentation in region 2A is required for mtDNA selective inheritance**

7 To test whether mtDNA segregation was required for selective inheritance, we attempted to  
8 increase the number of nucleoids per mitochondrion by tampering with mitochondrial fission.  
9 We quantified the nucleoid numbers in individual mitochondrion in *Fis1* knockdown flies (Fig. 2  
10 B and C). In 16-cell cyst region 2A, only 47.7% of mitochondria contained a single nucleoid,  
11 compared to 73.9% in wild-type (Fig. 2 C). Additionally, RNAi against *Drp1* (Fig. S4 A and B), a  
12 small GTPase that promotes mitochondria fission (Labrousse et al., 1999), caused similar  
13 phenotypes as these in *Fis1* knockdown flies. Thus, inhibition of mitochondrial fission impairs  
14 mitochondria genome segregation.

15

16 We next tested the impact of impaired mitochondrial fission on mtDNA selective inheritance in  
17 heteroplasmic flies. We knocked down *Fis1* or *Drp1* in the female germline of the  
18 heteroplasmic fly using *bam-gal4* driver and quantified heteroplasmy in mothers and their eggs.  
19 Under the restrictive temperature, the average proportion of *ts* allele was decreased by 15% in  
20 eggs compared to their mothers in control flies (Fig. 2 E), indicating a selection against the  
21 deleterious mtDNA. By contrast, in both *Fis1* RNAi and *Drp1* RNAi flies, the load of *ts* allele in  
22 progeny displayed a pattern of random mtDNA segregation, with no clear decrease in the  
23 proportion of *ts* genomes (Fig. 2 E; Fig. S4 C). These results suggest that the inhibition of  
24 mitochondrial fission at region 2A weakened mtDNA selective transmission. Taken together,  
25 these observations indicate that mitochondrial fission promotes nucleoid segregation in region  
26 2A and is required for effective mtDNA selection.

27

#### 28 **Mitochondrial activity and mitochondrial DNA expression commence in region 2B**

29 We hypothesize that for heteroplasmic cells to distinguish between mitochondria with different  
30 mtDNA genotypes, ETCs genes on mitochondrial genomes have to be expressed to assess their  
31 functional readout: mitochondrial respiration. To test this idea, we examined the pattern of  
32 mtDNA-encoded gene expression in the germanium by fluorescence *in situ* hybridization (FISH),  
33 using short DNA probes targeted to two mtDNA encoded mRNAs: *NADH dehydrogenase 4 (ND4)*  
34 and *cytochrome c oxidase subunit 1 (cox1)* (Fig. 3 A). For either *ND4* or *cox1*, moderate level of  
35 mRNA was detected in GSCs, but almost no signal in region 2A. In the following 16-cell cyst at  
36 region 2B, a strong mRNA signal was observed, suggesting that mtDNA expression commences  
37 at this stage (Fig. 3 B). We also checked the expression pattern of two ETC subunits encoded in  
38 the nuclear genome: *NADH: ubiquinone oxidoreductase subunit B5 (NDUFB5)* and *cytochrome c*  
39 *oxidase subunit 5A (cox5A)* (Fig. 3 A). Both transcripts showed an expression pattern similar to  
40 that of mtDNA-encoded mRNAs, i.e., moderate expression in germline stem cells, nearly no  
41 expression in region 2A, and strong expression in region 2B (Fig. 3 B). Interestingly, the  
42 localization of these two transcripts resembled that of mitochondria at the region 2B  
43 germarium, which is consistent with previous studies that mitochondrial ETCs genes undergo  
44 local translation on mitochondrial outer membrane (Williams et al., 2014; Zhang et al., 2016).

1 The coordinated expression of mitochondrial and nuclear genes encoding subunits of the ETC in  
2 region 2B led us to ask whether mitochondrial respiration was also activated at this stage.

3  
4 To address this question, we analyzed mitochondrial membrane potential during germarium  
5 development, using tetramethylrhodamine methyl ester (TMRM), a dye that accumulates in  
6 polarized mitochondria (Scaduto and Grotyohann, 1999). We found that the ratio of TMRM to  
7 MitoTracker green (a marker of mitochondrial mass) was markedly increased in germanium  
8 region 2B compared to regions 1 and 2A (Fig. 3 C), indicating that mitochondrial membrane  
9 potential is low in early-stage cysts, but up-regulated at the region 2B. The low level of  
10 membrane potential in the early germarium might simply owe to a lack of ETCs. To assess the  
11 level of ETCs, we directly evaluated activities of ETCs in a colorimetric assay by incubating  
12 ovaries with substrates of succinate dehydrogenase (complex II) and cytochrome C oxidase  
13 (complex IV) (Ross, 2011). Intense brown color, indicating that both complex II and complex IV  
14 are present and active, was evident in region 2B, but mostly absent in region 1 and region 2A  
15 (Fig. 3 D). This result is consistent with the mitochondrial membrane potential staining (Fig. 3 C),  
16 indicating that mitochondrial respiration is low in early germarium, but elevated in region 2B.  
17 Given their co-occurrence, the elevation of respiration is at least, partially due to the onset of  
18 mtDNA expression that generates ETCs in differentiating cysts region 2B, when selective  
19 inheritance begins.

20

### 21 **Mitochondrial activation in late germarium stage allows the selective propagation of** 22 **functional mtDNA**

23 Based on the results above, we hypothesized that mtDNA expression and the following  
24 activation of respiration may act as a stress test allowing germ cells to distinguish between  
25 mitochondria that harbor a wild-type versus a mutant mtDNA. We hence predicted that a  
26 ubiquitous disruption of mitochondrial activity in a heteroplasmic germ cell, would mask the  
27 deficiency of mitochondria harboring the deleterious mtDNA mutation, and impair selective  
28 inheritance. To disrupt respiration in all mitochondria, we knocked down a nuclear-encoded  
29 ETC gene, *cytochrome c oxidase subunit 5A (cox5A)* in ovaries driven by *nanos-gal4* (Fig. S2 A).  
30 Strong knockdown of *cox5A* led to degeneration of ovaries. We were able to find an  
31 appropriate RNAi line that moderately decreased the mRNA level of *cox5A* (Fig. S2 D and F), but  
32 did not affect the fecundity of the female flies or the hatching rate of their progeny (Fig. S5).  
33 Nonetheless, complex IV activity was markedly decreased in the knockdown germarium (Fig. 3  
34 D). Importantly, knockdown of *cox5A* in heteroplasmic *mt:Col<sup>T3001</sup>* background severely  
35 impaired the selection against the *ts* allele (Fig. 3 E).

36

37 The universal disruption of mitochondrial respiration by knocking down *cox5A* in a germ cell,  
38 not only masks the differential energetic status among different mitochondria, but also could  
39 potentially impair cellular energy metabolism. If the activation of mitochondrial respiration in  
40 region 2B indeed functions as the stress test for mtDNA integrity, we anticipated that improving  
41 the respiratory activity of defective mitochondria carrying deleterious mutations would also  
42 weaken selective inheritance in heteroplasmic flies. We previously showed that the ectopic  
43 expression of an alternative oxidase, AOX, that catalyzes electron transfer from ubiquinone to  
44 molecular oxygen and bypasses the cytochrome chain reactions, completely restored the

1 viability of *mt:Col<sup>T300l</sup>* flies (Chen et al., 2015). Expression of AOX in the germ cells driven by  
2 *nanos-gal4* partially restored mtDNA replication in region 2B of homoplasmic *ts* flies raised at  
3 29 °C, based on an EdU incorporation assay (Fig.4 A and C). Since mtDNA replication in region  
4 2B depends on active respiration (Hill et al., 2014), this observation confirms that AOX  
5 overexpression rescues the respiration defect of *ts* mitochondria at restrictive temperature.  
6 When we overexpressed AOX in heteroplasmic flies, we found the reduction of *ts* allele in  
7 progeny was much less pronounced than in control flies (Fig. 4 D). This observation indicates  
8 that mitigating the mitochondrial deficiency caused by *ts* mtDNA impairs the selection process.

9  
10 The fact that improving respiration in heteroplasmic flies without affecting the overall cellular  
11 energy metabolism, can weaken selective inheritance suggests that germ cells indeed rely on  
12 the respiratory activity of individual mitochondria to gauge the integrity of their mtDNA. Based  
13 on our replication-competition model, respiratory activity would then promote selective  
14 mtDNA inheritance by allowing the wild-type mtDNA harbored by healthy mitochondria to  
15 replicate more efficiently than the mutant mtDNA harbored by respiration-defective organelles.  
16 This model predicts that mtDNA replication would be required for selective inheritance. To test  
17 this idea, we attempted to inhibit mtDNA replication in heteroplasmic flies. We found that  
18 knockdown mitochondrial single-stranded DNA binding protein (*mtSSB*) (Fig. S2 E), an essential  
19 factor for mtDNA replication (Korhonen et al., 2004), markedly reduced mtDNA replication in  
20 region 2B, while mtDNA replication in later egg chambers appeared unaffected (Fig. 4 B). This  
21 result is consistent with the notion that mtDNA replication in region 2B is particularly sensitive  
22 to mitochondrial disruption (Hill et al., 2014). Importantly, knocking down *mtSSB* in  
23 heteroplasmic flies greatly diminished selective inheritance (Fig. 4 E). Additionally, RNAi against  
24 *tamas*, the mitochondrial DNA polymerase also diminished the selection against the *ts* mtDNA  
25 (Fig. S 6), supporting that mtDNA replication in region 2B is indeed necessary for selective  
26 inheritance. Taken together, the results described above suggest that activation of  
27 mitochondrial respiration serves as a stress test that identifies healthy mitochondria and  
28 promotes the replication of their mtDNA.

### 30 **Balbani body makes a small contribution to selective inheritance in germ cells**

31 So far, we have shown that mtDNA molecules are effectively segregated before region 2B and  
32 begin expressing their genes and replicating in region 2B. In a heteroplasmic background, these  
33 concerted behaviors presumably allow the healthy mitochondria containing wild-type mtDNA  
34 to outcompete the defective mitochondria harboring deleterious mutations in developing germ  
35 cells, which effectively reduces the proportion of mtDNA mutations in mature oocytes.

36  
37 However, a developmentally-regulated localization and transport of mitochondria in the  
38 germarium has also been proposed to contribute to mtDNA selection (Cox and Spradling, 2003).  
39 In germarium region 2B, healthy mitochondria are preferentially associated with fusome (Hill  
40 et al., 2014). Some fusome-associated mitochondria will be transported to the Balbani body  
41 and populate in the pole plasm (COX and Spradling 2006), the cytoplasm of future primordial  
42 germ cells (PGCs). Thus, one would expect the PGCs of an embryo to have a lower level of  
43 mtDNA mutations than its somatic cells. To test this idea, we isolated PGCs from the fertilized  
44 eggs of heteroplasmic flies expressing a germ cell specific reporter, Vasa-GFP, by fluorescence-



1 based cell sorting, and compared levels of the *ts* allele in PGCs and somatic cells. At 29 °C, the  
2 proportion of *ts* genomes in PGCs was slightly, but consistently, lower than in somatic cells in  
3 the same batch of embryos (Figure 5A, ctrl). The difference in heteroplasmic level between  
4 PGCs and somatic tissues was about 3% on average. To confirm that this difference results from  
5 an enrichment for healthy mitochondria in the Balbiani body, we performed the same  
6 experiment in the context of a germline-specific knockdown of *milton*, the adaptor that  
7 mediates the Kinesin-dependent transport of mitochondria to the Balbiani body (Cox and  
8 Spradling, 2006). In forming follicle, there were much less mitochondria at the anterior end of  
9 the *milton* knockdown oocyte compared to the control (Fig. 5 B). Mitochondria dispersed  
10 throughout the cytoplasm of the oocyte in the control stage 5 egg chambers. However, *milton*  
11 knockdown oocytes contained much fewer mitochondria, most of which remained at the  
12 anterior end (Fig. 5 B). These phenotypes resemble those of a *milton* null mutant (Cox and  
13 Spradling, 2006), indicating the effective disruption of both Milton activity and Balbiani body  
14 formation. Of primary importance, the load of *ts* allele was similar between PGCs and somatic  
15 cells in *milton* knockdown flies (Fig. 5 A), suggesting that a Balbiani body-associated selection of  
16 mitochondria does take place. This selection plays a complement role to further improve  
17 mitochondrial fitness in germ cells and may act synergistically with other mechanisms to further  
18 enhance the selective transmission of mtDNA in *Dm*.

19

## 20 Discussion

21

22 In this study, we illustrate a series of developmentally-orchestrated mitochondrial processes in  
23 *Dm* germarium, including mitochondrial fragmentation in early germarium cysts, mtDNA  
24 expression and ETCs activation in late germarium region 2B, that are indispensable for  
25 restricting the transmission of deleterious mtDNA mutations (Fig. 6). Using FIB-SEM and  
26 computational segmentation, we comprehensively documented mitochondrial morphology in  
27 *Drosophila* germarium. We found that mitochondria displayed a wide range of size and shape in  
28 developing germ cells. A sub-population of elongated, tubular mitochondria in region 1 undergo  
29 a drastic morphological change, transitioning to dispersed, rounded organelles in region 2A  
30 through Fis1 and Drp1 mediated fission. The mitochondrial fragmentation, together with the  
31 lack of mtDNA replication in region 2A, effectively segregates mitochondrial genomes. The  
32 chance of potential complementation among different mitochondrial genomes is minimized. At  
33 region 2A, when mtDNA segregation takes place, mtDNA is not actively transcribed. Progressing  
34 into region 2B, mtDNA expression is activated, which triggers the biogenesis of ETCs and the  
35 activation of mitochondrial respiration. In heteroplasmic germ cells, mtDNA expression acts as a  
36 stress test for the integrity of mitochondrial genome. Mitochondria harboring wild-type  
37 genome will have functional ETCs and active respiration, whereas mitochondria containing  
38 deleterious mutations have defective ETCs and impaired respiration. At region 2B, mtDNA  
39 replication resumes, and preferentially takes place in healthy mitochondria (Hill et al., 2014). As  
40 a result, the proportion of wild-type genome increase through oogenesis. It is known that many  
41 nuclear-encoded mitochondrial proteins including several key factors required for mtDNA  
42 replication, are synthesized locally on mitochondrial surface by cytosolic ribosomes through a  
43 mitochondrial outer membrane protein Mdi (Zhang et al., 2016). This local translation allows

1 coupling of synthesis and import of mitochondrial proteins. The import of preproteins across  
2 mitochondrial inner membrane requires mitochondrial membrane potential, which depends on  
3 active mitochondrial respiration (Geissler et al., 2000). We also found that local translation also  
4 preferentially takes place on healthy, polarized mitochondria (Zhang et al., 2019). Therefore,  
5 unhealthy mitochondria, due to the impaired local translation and import, will be starved of  
6 nuclear-encoded factors that are essential for mitochondrial biogenesis and mtDNA replication.  
7 This may underlie, or at least contribute to, the selective replication of wild-type genomes.

8  
9 We previously found that mtDNA replication commences in the 16-cell cysts at region 2B, and is  
10 dependent on mitochondrial respiration. Hence, we proposed a model of selective inheritance  
11 through replication competition, in which healthy mitochondria containing a wild-type genome  
12 proliferate much more vigorously and outcompete these harboring deleterious mutations. This  
13 model explains the gradual decline of the load of deleterious mutations over generations. In  
14 mouse models, mutations on protein-coding genes that severely affect the mitochondrial  
15 respiratory chain activity were eliminated much faster than mild mutations on tRNA genes  
16 (Stewart et al., 2008a; Stewart et al., 2008b). This observation is consistent with our model of  
17 selection based on the functionality of individual genome, which might represent a conserved  
18 mechanism guiding mitochondrial inheritance in metazoans.

19  
20 We found that a proportion of healthy mitochondria in the oocytes is pre-selected to join the  
21 Balbiani body, which eventually populates germ plasm in developing embryos. Thus, the  
22 Balbiani body enforces another purifying selection to further enhance mitochondrial fitness  
23 specifically in germ cells of offspring. The exact mechanism of how the healthy mitochondria  
24 are predetermined and unevenly distributed in the oocyte is unclear. Given the essential role of  
25 Milton in the formation of Balbiani body and mtDNA selective inheritance, it is possible that the  
26 healthy mitochondria are preferentially transported along the microtubules to Balbiani body,  
27 and then localized to the posterior end of oocytes. Balbiani body is a conserved structure in  
28 developing oocytes of several different species (Cox and Spradling, 2003; Pepling et al., 2007;  
29 Tworzydło et al., 2016; Zhou et al., 2010). Its role in mitochondrial inheritance, particularly  
30 selective inheritance against damaging mtDNA mutations, remains to be explored in flies and  
31 other organisms.

32  
33 Other models have also been proposed to explain how harmful mtDNA mutations are restricted  
34 from transmission through the female germline. Depolarized mitochondria can be cleared  
35 through Parkin-PINK1 mediated mitophagy in cultured cells (Narendra et al., 2010). A recent  
36 study demonstrated that mitophagy proteins ATG1 and BINP3 were required for mtDNA  
37 selection (Lieber et al., 2019). However, neither Parkin (Ma et al., 2014), nor ATG-8 dependent  
38 mitophagy involves in selective inheritance (Lieber et al., 2019; Zhang et al., 2019). This new  
39 type of selective mitophagy may act in parallel with the replication competition, to limit the  
40 transmission of deleterious mtDNA mutations. However, this potential redundancy cannot  
41 explain the complete loss of selection in the *mdi* mutant that lacks mtDNA replication in ovaries  
42 specifically (Zhang et al., 2019), but is largely healthy otherwise (Zhang et al., 2016). It is  
43 possible that Mdi, an outer-membrane has an unnoted role in the BINP3-mediated mitophagy,  
44 which awaits for future investigation.

1  
2 Random segregation of mtDNA, enforced by a mitochondrial bottleneck, in principle could lead  
3 to the elimination of unhealthy germ cells or individuals with an excess of damaging mtDNA  
4 mutations through Darwinian selection (Stewart and Larsson, 2014). In *Drosophila*, mtDNA  
5 copy number remains constant from PGCs in embryo to GSCs and cystoblasts in pupae (Hurd et  
6 al., 2016). In the adult germaria region 2A, the absence of mtDNA replication (Hill et al., 2014),  
7 greatly reduces mtDNA copy number per germ cell at the 16-cell stage. However, all  
8 mitochondria from the 16-cell cyst derived from a single cystoblast end up in the oocyte  
9 (Ganguly et al., 2012). Thus, the lack of mtDNA replication in proliferating cysts should not be  
10 mistakenly considered as a way to generate bottleneck. We estimate each GSC contains ~80  
11 nucleoids. This number is in the range of the calculated value of mitochondria segregation unit  
12 (Ma et al., 2014). The relatively small number of mtDNA segregation unit, together with the  
13 large population size would be sufficient to facilitate the effective segregation of mitochondrial  
14 variants in *Dm*. For mtDNA mutations that do not severely impair mitochondrial respiration,  
15 but only mildly affect other mitochondrial activities, such as reactive oxygen species  
16 metabolism or heat production (Wallace, 2005), may not be sensitive to the selective  
17 inheritance described in this study. Nonetheless, the random segregation of different  
18 mitochondrial haplotypes, and through their interactions with both nuclear genome and  
19 environmental factors would produce progeny with different fitness outcome. This would exert  
20 a natural selection on organismal level and hence figure important in mtDNA selection and  
21 evolution (Lajbner et al., 2018; Wallace, 2005).  
22

## 1 **Methods**

### 2 ***Drosophila* genetics**

3 Flies were maintained on cornmeal medium at 25 °C, unless otherwise stated. *w*<sup>1118</sup> was used as  
4 the wild-type control. Heteroplasmic *mt:Col<sup>T300I</sup>* flies were generated as described previously  
5 (Hill et al., 2014), and maintained at 18 °C, unless otherwise stated. Generation of the  
6 TFAM-GFP reporter lines were described previously (Zhang et al., 2016). The UASp-AOX  
7 transgenic fly was generated by subcloning the *Ciona intestinalis* alternative oxidase coding  
8 sequence into the pUASp vector (Rorth, 1998), followed by standard germline transformation  
9 procedures (Chen et al., 2015). UASp-mtGFP transgenic fly was generated by subcloning EGFP  
10 cDNA into the pUASp vector (Rorth, 1998), followed by standard germline transformation  
11 procedures. *Fis1* RNAi (BL#63027), *cox5A* RNAi (BL#58282), *mtSSB* RNAi lines (BL#50600), *milton*  
12 RNAi (BL#43173), X-linked mChFP-Rho1(BL#52280), *bam-gal4* (BL#80579), *nanos-gal4* (BL#4937)  
13 came from the Bloomington *Drosophila* Stock Center (Bloomington, IN). *Drp1* RNAi (v44156),  
14 *tamas* RNAi (v3135) were from Vienna *Drosophila* Resource Center (VDRC). *Vasa*-GFP (#109171)  
15 came from the Kyoto *Drosophila* Genomics and Genetics Resources.

16  
17 *Dm* fecundity and embryo hatch rate were performed according to previous study (Zhang et al.,  
18 2016). Knocking down of *Fis1*, *Drp1* driven by *bam-gal4*, knocking down of *cox5A*, *mtSSB*, *tamas*  
19 driven by *nanos-gal4*, and the overexpression of AOX by *nanos-gal4* did not change the  
20 fecundity of the female flies, as well as the hatch rate of their progeny (Fig. S5).

### 21 22 **Immunostaining of *Drosophila* germ cells**

23 For staining of adult ovaries, 1-to-2-day old females were fed with yeast overnight prior to  
24 analysis. Ovaries were dissected in Schneider's medium supplemented with 10% fetal bovine  
25 serum (FBS, Gibco) at room temperature. Ovaries were fixed for 20 minutes in 3.7%  
26 paraformaldehyde (Electron Microscopy Sciences) in PBS, then permeabilized in PBS containing  
27 0.5% Triton-X100. After blocking in the PBSBT buffer (1 x PBS, 0.1% Triton-X100, 0.2% bovine  
28 serum albumin, BSA), the ovaries were incubated with primary antibodies overnight at 4 °C.  
29 Following washing with PBSBT buffer for three times, the ovaries were incubated with  
30 secondary antibodies at room temperature for 1 hr and washed again with PBSBT buffer for  
31 three times. Each ovariole was separated with fine-nose forceps under the stereomicroscope  
32 and mounted with Prolong Glass antifade mounting medium (Invitrogen) on the slides. Regular  
33 confocal imaging were collected on a Perkin Elmer Ultraview system and processed with  
34 Volocity software.

35  
36 Antibodies used were as follows: mouse ATP synthase subunit  $\alpha$  (Abcam, 15H4C4, 1:1,000), Rat  
37  $\alpha$ -Vasa (Developmental Studies Hybridoma Bank, DSHB, 1:200), Hts-1B1 (DSHB, 1:200); Alexa  
38 Fluor 647-Phalloidin (Invitrogen, 1:50); Alexa Fluor 568 goat  $\alpha$ -Rat IgG (Invitrogen, 1:200), Alexa  
39 Fluor 568 goat  $\alpha$ -mouse IgG (Invitrogen, 1:200), Alexa Fluor 568 goat  $\alpha$ -rabbit IgG (Invitrogen,  
40 1:200).

### 41 42 **Stimulated Emission Depletion (STED) microscopy and imaging quantification**

1 STED microscopy equipped with a Leica 100x (1.4 N.A.) STED White objective was used for  
2 imaging germaria stained for ATP synthase subunit  $\alpha$  and TFAM-GFP (Combs et al., 2019). 3D  
3 stack images (10  $\mu\text{m}$  of z-stack and 0.16  $\mu\text{m}/\text{z}$ -step) were analyzed with ImageJ. Cells from  
4 different germarium regions were selected manually by “freehand selection” function and  
5 isolated by “duplicate” function. Fluorescence outside the selected cell regions was removed by  
6 “clear outside” function. Background fluorescence value from each cell image was determined  
7 from an 1.5 x 1.5  $\mu\text{m}^2$  region in the nucleus and subtracted from the original cell image by using  
8 “math-subtract” function. Individual mitochondrion and nucleoid from ATP syn  $\alpha$  and TFAM-  
9 GFP channels, respectively, were called out using “color threshold” function with a  
10 “MaxEntropy” thresholding setting. Fluorescence outside the outlined ATP syn  $\alpha$  and TFAM-GFP  
11 regions was removed by “clear outside” function. Next, we utilized an “restore selection”  
12 function to copy the outlined TFAM-GFP particle regions into the corresponding ATP syn  $\alpha$   
13 image. Then, the nucleoid number per mitochondrion was calculated manually as the number  
14 of outlined TFAM-GFP particles in an outlined ATP syn  $\alpha$  particle. TFAM-GFP that marks  
15 nucleoids does not always displayed round dot shape. Instead, some puncta showed  
16 connection in between to form peanut shape staining, which may reflect different compaction  
17 state of mtDNA. To address this, 8-bit binary images for TFAM-GFP staining were generated  
18 using the “Make binary” function and further refined using a “watershed” function integrated  
19 in ImageJ to separate “touching” TFAM-GFP objects. After background removal and “clear  
20 outside” processing, non-mitochondria areas has zero fluorescence intensity, thus single  
21 mitochondrion was defined as ATP synthase subunit  $\alpha$  staining with continuous pixels of  
22 fluorescence intensity. We noticed that the ATP synthase  $\alpha$  subunit staining was not always  
23 uniform, with less intensity in the regions where nucleoids were located, which could be due to  
24 lack of cristae structures surrounding nucleoids (Stephan et al., 2019). Thus, a single  
25 mitochondrion was called if two adjacent, but distinct ATP synthase  $\alpha$  puncta were connected  
26 with a single nucleoid. We found that there were  $\sim 10\%$  TFAM-GFP puncta in the cell localized in  
27 clustered mitochondria, which are unable to be individualized by ImageJ programs. This  
28 population of TFAM-GFP puncta were excluded from quantification.

29

### 30 **3D Volume FIB-SEM**

31 FIB-SEM were performed as previously described with modifications (Bleck et al., 2018). Ovaries  
32 were dissected in Schneider’s medium supplemented with 10% fetal bovine serum (FBS, Gibco),  
33 and immediately fixed in fixation solution (2.5% glutaraldehyde, 2% formaldehyde, 2 mM  
34 calcium chloride in 0.1 M sodium cacodylate buffer) at room temperature for 5 min, followed  
35 by an additional fixation on ice for 3 hr. After washing in cold cacodylate buffer containing 2  
36 mM calcium chloride, the ovaries were post-fixed with reduced 2%  $\text{Os}_2\text{O}_4$  (reduced by 1.5%  
37 potassium ferrocyanide right before use ) for 1 hr on ice. Following washing with water, the  
38 tissues were placed in the thiocarbonylhydrazide (TCH) solution for 20 min at room temperature.  
39 Then, the ovaries were fixed in 2%  $\text{Os}_2\text{O}_4$  for 30 min at room temperature, *en bloc* stained with  
40 1% uranyl acetate overnight at 4°C, and further stained with Walton’s lead aspartate solution  
41 for 30 min at 60°C. After dehydration with ethanol series, the samples were embedded in  
42 Durcupan ACM resin (Electron Microscopy Sciences, Hatfield PA).

43

1 Embedded samples were then faced with a trim tool 90 diamond knife (DiATOME, Switzerland)  
2 on a Leica UCF-7 ultramicrotome (Vienna, Austria) and sputter coated with palladium/gold with  
3 a thickness of 50 nm in an EMS 575X sputter coater (Electron Microscopy Sciences, Hatfield, PA).  
4 The samples were imaged using a ZEISS Crossbeam 540 FIB-SEM microscope (Carl Zeiss  
5 Microscopy GmbH, Jena, Germany). Platinum and Carbon pads were deposited over the region  
6 of interest, and the run was set up and controlled by Atlas 5 software (Fibics Incorporated).  
7 SEM images were acquired using an accelerating 1.5 keV with a 1.5 nA of beam current and the  
8 in-lens detector captured backscattered electrons. The milling was performed with a FIB  
9 operating at 30 keV with a beam current 700 pA. The slice thickness and imaging pixel size were  
10 set to 10 x 10 x 10 nm voxels. The total volume acquired per tissue sample was as follows: wild-  
11 type: 29.59 x 26.19 x 30.30  $\mu\text{m}$  (XYZ); *Fis1* knockdown: 29.06 x 31.67 x 19.29  $\mu\text{m}$  (XYZ). The  
12 milling was performed from the anterior tip of the germaria towards posterior.

13  
14 **Segmentation of mitochondria and cell clusters**  
15 Image segmentation was completed on a desktop PC (Thinkmate, Waltham MA) running  
16 Windows 10 with Intel Xeon Gold 6254 3.10 GHz processors, 2.0 TB RAM and an NVIDIA Titan V  
17 12 GB VRAM video card. We used Dragonfly software (Ver. 4.1; Object Research Systems,  
18 Montreal QC) to segment the mitochondria and cells, and to collect mitochondrial  
19 morphometric information. Segmentation of mitochondria was completed using the U-Net  
20 convolutional neural network within the deep-learning tool in Dragonfly (Ronneberger et al.,  
21 2015). We used six raw FIB-SEM images from evenly distributed regions (approx. one image  
22 every 400 steps) of the wild-type sample to build our mitochondrial training set for the U-Net  
23 model. Mitochondria were initially segmented by labelling the outer-mitochondrial membrane  
24 (OMM) via thresholding followed by manual clean-up. Next, the mitochondrial matrix was  
25 segmented using the fill inner area tool of the OMM region of interest (ROI) followed by the  
26 erode tool and manual cleaning to eliminate the OMM ROI. We used this training dataset to  
27 build the U-net model where training data were augmented (horizontal and vertical flip, 180°  
28 max rotation, 10° max shear, 75-150 % scale, 0-2 brightness, and 0-0.10 Gaussian noise) and 20%  
29 of the training data were used for validation. We used categorical cross-entropy for our loss  
30 function and Adadelta for our optimization algorithm. The model was then applied to the full  
31 volume to segment out the mitochondrial matrix, which was then manually cleaned.

32  
33 To segment individual mitochondria, we used a watershed mapping approach. Watershed map  
34 seed points were isolated from the previously described mitochondrial matrix ROI using a  
35 connected components analysis. The boundaries of this watershed map were set by the OMM,  
36 which was included by dilating the mitochondrial matrix ROI – followed by manual cleaning. A  
37 minor population of segmented objects have light staining, which could be swollen  
38 mitochondria, undifferentiated mitochondria that have less cristae, or *Wolbachia*. We were  
39 unable to unequivocally call out *Wolbachia* based on the presence of three layers of  
40 membranes, a distinct feature of *Wolbachia* (White et al., 2017), due to the limited resolution  
41 of FIB-SEM. Nonetheless, we ran analyses on dense-stained objects only, and found the trend of  
42 mitochondrial fragmentation was essentially the same as shown in Figure 1, demonstrating that  
43 potential inclusion of *Wolbachia* does not interfere with our analyses. Importantly, *Fis1*

1 knockdown, which should have no impact on the morphology of *Wolbachia*, effectively shifted  
2 the morphology of objects, further supporting our conclusion.

3  
4 In FIB-SEM images, the size of nuclei and locations of cells were used to distinguish germ cells  
5 from somatic cells. For germ cells, their relative locations in a germarium, and the number of  
6 interconnected germ cells, judged by presence of ring canals and connecting fusome within a  
7 cyst, were used to determine their developmental stage. Cell clusters were segmented from the  
8 3D volume using z-interpolation over 50 image intervals. Cell cluster-specific mitochondrial  
9 surface area and volume were extracted from these datasets.

10

### 11 **Membrane potential staining**

12 Adult ovaries were dissected in Schneider's medium supplemented with 10% fetal bovine  
13 serum and incubated with medium containing Tetramethylrhodamine (TMRM, Invitrogen,  
14 1:1000) and mitoTracker Green (Invitrogen, 100 nM) for 20 min. The ovaries were rinsed with  
15 PBS for 3 times, and then imaged live on a Perkin Elmer Ultraview system within 1 hr. The  
16 position and morphological characters were used to define developmental stages of germ cells.  
17 The 16-cell cyst in region 2B is flatten and extends the entire width of the germarium.  
18 Mitochondria are closely associated with fusome at this region, thus the mitochondrial staining  
19 within the cyst at this stage display a long, branched appearance along the fusome structures.  
20 Region 2A cysts are considered as locating immediately anterior of the first region 2B cyst.

21

### 22 **Mitochondrial activity staining and EdU labelling of *Drosophila* adult ovaries**

23 Histochemical staining for the activity of mitochondrial succinate dehydrogenase (complex II)  
24 and cytochrome C oxidase (complex IV) in ovaries was performed as previously described  
25 (Wang et al., 2019). EdU incorporation assay in *Drosophila* ovaries was carried out as described  
26 (Hill et al., 2014). The ovaries were co-stained for fusome to define developmental stages of  
27 germ cells.

28

### 29 **Single-molecule fluorescence *in situ* hybridization and quantification**

30 The mitochondrial and nuclear-encoded transcripts in the germarium was detected using a  
31 single-molecule fluorescence *in situ* hybridization (smFISH) protocol published previously (Trcek  
32 et al., 2017). The sequence of fluorescently labelled short DNA probes targeting to *ND4*, *cox1*,  
33 *NDUFB5*, *cox5A*, *Fis1*, *Drp1*, *mtSSB* mRNA are listed in Table S2.

34

35 Series images with FISH and nuclear (DAPI) channels were collected by an Instant Structured  
36 Illumination (iSIM) microscope (VisiTech International) and processed in ImageJ. Germline cells  
37 and germarium regions were identified based upon the position, morphological characters and  
38 the nuclei size (DAPI staining). Nuclei of region 2B germ cells are round and surrounded by pre-  
39 follicle cells that have smaller oval or round shape nuclei. Region 2A cysts are located  
40 immediately anterior of the first region 2B cyst. To quantify relative mRNA level of *ND4*,  
41 *NDUFB5*, *COX1*, or *COX5A* in the region 2A and 2B cysts (Figure 3B), cysts from germarium  
42 region 2A and 2B were manually outlined, duplicated to display as two different images with  
43 the "Duplicate" function, and isolated by the "clear outside" function, respectively. The "3D  
44 objects counter" plugin with smallest threshold setting was used to select whole cyst region

1 and to quantify cyst volume from each series image. The “3D objects counter” plugin with  
2 automatic threshold setting was used to select and to quantify fluorescence density of each  
3 FISH punctum in 3D. Background fluorescence value was subtracted from total FISH  
4 fluorescence density in each germarium region. The resulting net FISH fluorescence density was  
5 divided by the corresponding cyst volume.

6  
7 RNAi for *Fis1*, *Drp1*, *cox5A*, and *mtSSB* were performed specifically in the germ cell. The  
8 abundance of these transcripts in the follicle cells should not be affected. Therefore, we utilized  
9 the smFISH fluorescence intensity in follicle cells as an internal control to determine the  
10 knockdown efficiency of each RNAi line. In ImageJ, the areas of region 2A cysts (for *Fis1* and  
11 *Drp1* RNAi) or region 2B cysts (for *cox5A* and *mtSSB* RNAi), and their corresponding region 2B  
12 follicle cells, were manually outlined. The fluorescence intensity from each selected region was  
13 calculated with the method describe above. The resulting smFISH fluorescence intensity from  
14 region 2A or region 2B cysts were normalized by that of the corresponding region 2B follicle  
15 cells.

16

### 17 **Primordial germ cell isolation from *Dm***

18 The primordial germ cells from *Dm* embryos and pupae were isolated as previously described  
19 (Shigenobu et al., 2006) with modification. A Vasa-GFP transgene that specifically labels germ  
20 cells throughout the life cycle was used to isolate the germ cells using fluorescence-activated  
21 cell sorting (FACS) assay. Female PGCs were separated from male PGCs by an X-chromosome  
22 linked monomeric cherry fluorescence (mChFP) tagged Rho1 protein under control of Rho1  
23 regulatory sequence (Abreu-Blanco et al., 2014). The female Vasa-GFP transgenic flies, which  
24 carry wild-type or heteroplasmic *mt:Col<sup>T3001</sup>* mtDNA, were crossed with male X-linked mChFP-  
25 Rho1 flies in cages and allowed to lay eggs on a grape agar plate (Genesee Scientific, Inc). The  
26 germ cells of the female progeny will carry both GFP and mChFP fluorescence. Following pre-  
27 collection for 3 hr, the embryos were collected and allowed to develop till stage 15 at 25 °C  
28 (staging according to (Williamson and Lehmann, 1996)). The embryos were then dechorionated  
29 for 30 s in 50% bleach. After washing with water, the embryos were transferred to a  
30 microcentrifuge tube filled with 500 µl of Schneider’s insect medium (Gibco). The blue pestle  
31 matching with the microcentrifuge tube (USA Scientific, Inc.) was used to gently homogenize  
32 the embryos. The homogenate was filtered through a 125 µm mesh and then centrifuged at  
33 860 g for 1 min at 4 °C. After one wash in ice-cold calcium-free Schneider’s medium (Sigma), the  
34 pellet was resuspended in calcium-free Schneider’s medium containing 0.25% trypsin  
35 (Invitrogen) and incubated at 37°C for 10 min. The cell suspension was filtered through a 35 µm  
36 mesh, and the same amount of Schneider’s medium supplemented with 20% fetal bovine  
37 serum was added to stop the trypsinization. The dissociated cells were pelleted by  
38 centrifugation at 860 g for 1 min. The cells were resuspended in Schneider’s medium and  
39 filtered through a 35 µm mesh immediately before cell sorting. Flow cytometry analyses were  
40 performed on a BD FACSCalibur flow cytometer and analyzed with FACSDiva. The female PGCs  
41 were sorted by gating for GFP and mChFP-positive events. Female somatic cells were sorted by  
42 gating for GFP-negative and mChFP-positive events. The quality and purity of the sorted PGCs  
43 were confirmed by fluorescence microscope. For isolation of PGCs from pupae, the staged



1 embryos were transferred to the standard cornmeal medium till the desired development stage.  
2 All the other procedures were the same except for the exclusion of the dechoriation step.

### 3 4 ***Drosophila* ovaries stem cell culture**

5 The fGS/OSS is a stable cell line consisting of a mixture of *Dm* adult female germline stem cell  
6 (fGS) and ovarian somatic sheath cells (OSS). OSS is the derivative line from which the fGS  
7 component has been lost. Both cell lines were obtained from *Drosophila* Genomics Resource  
8 Center (DGRC) and cultured as described previously (Niki et al., 2006).

### 9 10 **Measurement of mtDNA copy number**

11 To quantify mtDNA copy number, total DNA was isolated from the FACS-sorted PGCs or the  
12 somatic cells using QIAamp DNA Micro Kit (Qiagen). The mtDNA copy number was measured  
13 using droplet digital PCR (ddPCR, Bio-rad), a method for absolute quantification of nucleic acids.  
14 Primers were targeted to the mtDNA-encoded cytochrome c oxidase subunit I (Col), and the  
15 nuclear-encoded Histone 4 (His4) genes. Primers and probes used in ddPCR are as follows:  
16 Col-forward: 5'ATTGGAGTTAATTTAACATTTTTCTCA3', Col-rev: 5'AGTTGATACAATATTTTCATGT-  
17 TGTGTAAG3', Col-probe: 5'AATACCTCGACGTTATTCAGATTACCCA3', His4-for: 5'TCCAAGGTATCA-  
18 CGAAGCC3', His4-rev: 5'AACCTTCAGAACGCCAC3', His4-probe: 5'AGCGCATATCTGGACTCATATA-  
19 CGAG3'. The Col-probe and His4-probe were synthesized by labeling the 5' nucleotide with  
20 FAM and HEX reporter fluorophores, respectively. Around 1 µg of total DNA was digested with  
21 EcoRI at 37 °C for 1 hr. Then the ddPCR reaction mixture was assembled to contain 1x ddPCR  
22 Supermix for probes (Bio-rad), 900 nM of each forward and reverse primers, 250 nM of probe,  
23 and up to 1 ng of total DNA. The reaction was conducted in the QX200™ Droplet Generator,  
24 followed by the thermal cycler and analyzed by the QX200 Droplet reader as per the  
25 manufacturer's instruction.

### 26 27 **mtDNA selection and quantification of heteroplasmy**

28 mtDNA selection in the female germline was carried out according to previous study (Zhang et  
29 al., 2019). Briefly, heteroplasmic flies with wild-type and knockdown nuclear backgrounds were  
30 transferred from 18°C to 29°C right after eclosion. Individual heteroplasmic female fly was  
31 mated with five male *w<sup>1118</sup>* flies at 29°C and at least ten female flies were analyzed. Eggs  
32 produced during the first 6 days were discarded. The eggs laid on the 7<sup>th</sup> day were pooled and  
33 the heteroplasmic levels were compared between mother and her eggs. Quantification of  
34 heteroplasmic mtDNA was performed as described previously (Hill et al., 2014).

### 35 36 **Statistical analysis**

37 Data were analyzed using Student's *t* test, Mann-Whitney test or one-way analysis of variance.  
38 The difference was considered statistically significant when  $p < 0.05$ .

### 39 40 **Acknowledgements**

41 We thank F. Chanut for comments and edits on the manuscript; B. Glancy for advice and  
42 comments on the FIB-SEM work; M. Aronova and J. Cohen for EM technical assistance; NHLBI  
43 FACS core and NCI CCR Genomics core for technical support; Bloomington *Drosophila* Stock  
44 Center, Vienna *Drosophila* Resource Center, Kyoto *Drosophila* Genomics and Genetics

- 1 Resources for fly stocks; *Drosophila* Genomics Resource Center for *Dm* stem cell cultures;
- 2 Developmental Studies Hybridoma Bank for antibodies. This work is supported by NHLBI
- 3 Intramural Research Program.
- 4

## 1   **References**

- 2   Abreu-Blanco, M.T., J.M. Verboon, and S.M. Parkhurst. 2014. Coordination of Rho family  
3       GTPase activities to orchestrate cytoskeleton responses during cell wound repair. *Curr*  
4       *Biol.* 24:144-155.
- 5   Alam, T.I., T. Kanki, T. Muta, K. Ukaji, Y. Abe, H. Nakayama, K. Takio, N. Hamasaki, and D. Kang.  
6       2003. Human mitochondrial DNA is packaged with TFAM. *Nucleic Acids Res.* 31:1640-  
7       1645.
- 8   Bleck, C.K.E., Y. Kim, T.B. Willingham, and B. Glancy. 2018. Subcellular connectomic analyses of  
9       energy networks in striated muscle. *Nat Commun.* 9:5111.
- 10   Chan, D.C. 2006. Mitochondria: dynamic organelles in disease, aging, and development. *Cell.*  
11       125:1241-1252.
- 12   Chen, D., and D.M. McKearin. 2003. A discrete transcriptional silencer in the bam gene  
13       determines asymmetric division of the *Drosophila* germline stem cell. *Development.*  
14       130:1159-1170.
- 15   Chen, Z., Y. Qi, S. French, G. Zhang, R. Covian Garcia, R. Balaban, and H. Xu. 2015. Genetic  
16       mosaic analysis of a deleterious mitochondrial DNA mutation in *Drosophila* reveals  
17       novel aspects of mitochondrial regulation and function. *Mol Biol Cell.* 26:674-684.
- 18   Cox, R.T., and A.C. Spradling. 2003. A Balbiani body and the fusome mediate mitochondrial  
19       inheritance during *Drosophila* oogenesis. *Development.* 130:1579-1590.
- 20   Cox, R.T., and A.C. Spradling. 2006. Milton controls the early acquisition of mitochondria by  
21       *Drosophila* oocytes. *Development.* 133:3371-3377.
- 22   Cree, L.M., D.C. Samuels, S.C. de Sousa Lopes, H.K. Rajasimha, P. Wonnapijit, J.R. Mann, H.H.  
23       Dahl, and P.F. Chinnery. 2008. A reduction of mitochondrial DNA molecules during  
24       embryogenesis explains the rapid segregation of genotypes. *Nat Genet.* 40:249-254.
- 25   Fan, W., K.G. Waymire, N. Narula, P. Li, C. Rocher, P.E. Coskun, M.A. Vannan, J. Narula, G.R.  
26       Macgregor, and D.C. Wallace. 2008. A mouse model of mitochondrial disease reveals  
27       germline selection against severe mtDNA mutations. *Science.* 319:958-962.
- 28   Felsenstein, J. 1974. The evolutionary advantage of recombination. *Genetics.* 78:737-756.
- 29   Frank, S., B. Gaume, E.S. Bergmann-Leitner, W.W. Leitner, E.G. Robert, F. Catez, C.L. Smith, and  
30       R.J. Youle. 2001. The role of dynamin-related protein 1, a mediator of mitochondrial  
31       fission, in apoptosis. *Dev Cell.* 1:515-525.
- 32   Ganguly, S., L.S. Williams, I.M. Palacios, and R.E. Goldstein. 2012. Cytoplasmic streaming in  
33       *Drosophila* oocytes varies with kinesin activity and correlates with the microtubule  
34       cytoskeleton architecture. *Proc Natl Acad Sci U S A.* 109:15109-15114.
- 35   Geissler, A., T. Krimmer, U. Bomer, B. Guiard, J. Rassow, and N. Pfanner. 2000. Membrane  
36       potential-driven protein import into mitochondria. The sorting sequence of cytochrome  
37       b(2) modulates the  $\Delta\psi$ -dependence of translocation of the matrix-targeting  
38       sequence. *Mol Biol Cell.* 11:3977-3991.
- 39   Gilkerson, R.W., E.A. Schon, E. Hernandez, and M.M. Davidson. 2008. Mitochondrial nucleoids  
40       maintain genetic autonomy but allow for functional complementation. *J Cell Biol.*  
41       181:1117-1128.
- 42   Harris, L.K., and J.A. Theriot. 2018. Surface Area to Volume Ratio: A Natural Variable for  
43       Bacterial Morphogenesis. *Trends Microbiol.* 26:815-832.

- 1 Hauswirth, W.W., and P.J. Laipis. 1982. Mitochondrial DNA polymorphism in a maternal lineage  
2 of Holstein cows. *Proc Natl Acad Sci U S A*. 79:4686-4690.
- 3 Hill, J.H., Z. Chen, and H. Xu. 2014. Selective propagation of functional mitochondrial DNA  
4 during oogenesis restricts the transmission of a deleterious mitochondrial variant. *Nat*  
5 *Genet*. 46:389-392.
- 6 Hurd, T.R., B. Herrmann, J. Sauerwald, J. Sanny, M. Grosch, and R. Lehmann. 2016. Long Oskar  
7 Controls Mitochondrial Inheritance in *Drosophila melanogaster*. *Dev Cell*. 39:560-571.
- 8 Ishihara, N., Y. Fujita, T. Oka, and K. Mihara. 2006. Regulation of mitochondrial morphology  
9 through proteolytic cleavage of OPA1. *EMBO J*. 25:2966-2977.
- 10 Jenuth, J.P., A.C. Peterson, K. Fu, and E.A. Shoubridge. 1996. Random genetic drift in the female  
11 germline explains the rapid segregation of mammalian mitochondrial DNA. *Nat Genet*.  
12 14:146-151.
- 13 Korhonen, J.A., X.H. Pham, M. Pellegrini, and M. Falkenberg. 2004. Reconstitution of a minimal  
14 mtDNA replisome in vitro. *Embo Journal*. 23:2423-2429.
- 15 Kukat, C., C.A. Wurm, H. Spahr, M. Falkenberg, N.G. Larsson, and S. Jakobs. 2011. Super-  
16 resolution microscopy reveals that mammalian mitochondrial nucleoids have a uniform  
17 size and frequently contain a single copy of mtDNA. *Proc Natl Acad Sci U S A*. 108:13534-  
18 13539.
- 19 Labrousse, A.M., M.D. Zappaterra, D.A. Rube, and A.M. van der Bliek. 1999. C-elegans dynamin-  
20 related protein DRP-1 controls severing of the mitochondrial outer membrane.  
21 *Molecular Cell*. 4:815-826.
- 22 Lajbner, Z., R. Pnini, M.F. Camus, J. Miller, and D.K. Dowling. 2018. Experimental evidence that  
23 thermal selection shapes mitochondrial genome evolution. *Sci Rep-Uk*. 8.
- 24 Legros, F., F. Malka, P. Frachon, A. Lombes, and M. Rojo. 2004. Organization and dynamics of  
25 human mitochondrial DNA. *J Cell Sci*. 117:2653-2662.
- 26 Lieber, T., S.P. Jeedigunta, J.M. Palozzi, R. Lehmann, and T.R. Hurd. 2019. Mitochondrial  
27 fragmentation drives selective removal of deleterious mtDNA in the germline. *Nature*.
- 28 Ma, H., H. Xu, and P.H. O'Farrell. 2014. Transmission of mitochondrial mutations and action of  
29 purifying selection in *Drosophila melanogaster*. *Nat Genet*. 46:393-397.
- 30 Narendra, D.P., S.M. Jin, A. Tanaka, D.F. Suen, C.A. Gautier, J. Shen, M.R. Cookson, and R.J.  
31 Youle. 2010. PINK1 Is Selectively Stabilized on Impaired Mitochondria to Activate Parkin.  
32 *Plos Biology*. 8.
- 33 Niki, Y., T. Yamaguchi, and A.P. Mahowald. 2006. Establishment of stable cell lines of *Drosophila*  
34 germ-line stem cells. *P Natl Acad Sci USA*. 103:16325-16330.
- 35 Olivo, P.D., M.J. Van de Walle, P.J. Laipis, and W.W. Hauswirth. 1983. Nucleotide sequence  
36 evidence for rapid genotypic shifts in the bovine mitochondrial DNA D-loop. *Nature*.  
37 306:400-402.
- 38 Pepling, M.E., J.E. Wilhelm, A.L. O'Hara, G.W. Gephardt, and A.C. Spradling. 2007. Mouse  
39 oocytes within germ cell cysts and primordial follicles contain a Balbiani body. *Proc Natl*  
40 *Acad Sci U S A*. 104:187-192.
- 41 Rebolledo-Jaramillo, B., M.S. Su, N. Stoler, J.A. McElhoe, B. Dickins, D. Blankenberg, T.S.  
42 Korneliussen, F. Chiaromonte, R. Nielsen, M.M. Holland, I.M. Paul, A. Nekrutenko, and  
43 K.D. Makova. 2014. Maternal age effect and severe germ-line bottleneck in the  
44 inheritance of human mitochondrial DNA. *Proc Natl Acad Sci U S A*. 111:15474-15479.

- 1 Ronneberger, O., P. Fischer, and T. Brox. 2015. U-Net: Convolutional Networks for Biomedical  
2 Image Segmentation. *Lect Notes Comput Sc.* 9351:234-241.
- 3 Rorth, P. 1998. Gal4 in the Drosophila female germline. *Mech Dev.* 78:113-118.
- 4 Ross, J.M. 2011. Visualization of mitochondrial respiratory function using cytochrome c  
5 oxidase/succinate dehydrogenase (COX/SDH) double-labeling histochemistry. *J Vis*  
6 *Exp:e3266.*
- 7 Satoh, M., and T. Kuroiwa. 1991. Organization of multiple nucleoids and DNA molecules in  
8 mitochondria of a human cell. *Exp Cell Res.* 196:137-140.
- 9 Scaduto, R.C., Jr., and L.W. Grotyohann. 1999. Measurement of mitochondrial membrane  
10 potential using fluorescent rhodamine derivatives. *Biophys J.* 76:469-477.
- 11 Shigenobu, S., K. Arita, Y. Kitadate, C. Noda, and S. Kobayashi. 2006. Isolation of germline cells  
12 from Drosophila embryos by flow cytometry. *Dev Growth Differ.* 48:49-57.
- 13 Song, X.Q., G.B. Call, D. Kirilly, and T. Xie. 2007. Notch signaling controls germline stem cell  
14 niche formation in the Drosophila ovary. *Development.* 134:1071-1080.
- 15 Spradling, A.C. 1993. Developmental Genetics of Oogenesis. In *The Development of Drosophila*  
16 *melanogaster*. M.A.A. In: Bate M, editors, editor. New York: Cold Spring Harbor  
17 Laboratory Press. . pp. 1-70.
- 18 Stephan, T., A. Roesch, D. Riedel, and S. Jakobs. 2019. Live-cell STED nanoscopy of  
19 mitochondrial cristae. *Sci Rep.* 9:12419.
- 20 Stewart, J.B., C. Freyer, J.L. Elson, and N.G. Larsson. 2008a. Purifying selection of mtDNA and its  
21 implications for understanding evolution and mitochondrial disease. *Nat Rev Genet.*  
22 9:657-662.
- 23 Stewart, J.B., C. Freyer, J.L. Elson, A. Wredenberg, Z. Cansu, A. Trifunovic, and N.G. Larsson.  
24 2008b. Strong purifying selection in transmission of mammalian mitochondrial DNA.  
25 *PLoS Biol.* 6:e10.
- 26 Stewart, J.B., and N.G. Larsson. 2014. Keeping mtDNA in shape between generations. *PLoS*  
27 *Genet.* 10:e1004670.
- 28 Stojanovski, D., O.S. Koutsopoulos, K. Okamoto, and M.T. Ryan. 2004. Levels of human Fis1 at  
29 the mitochondrial outer membrane regulate mitochondrial morphology. *Journal of Cell*  
30 *Science.* 117:1201-1210.
- 31 Taylor, R.W., and D.M. Turnbull. 2005. Mitochondrial DNA mutations in human disease. *Nat Rev*  
32 *Genet.* 6:389-402.
- 33 Trcek, T., T. Lionnet, H. Shroff, and R. Lehmann. 2017. mRNA quantification using single-  
34 molecule FISH in Drosophila embryos. *Nat Protoc.* 12:1326-1348.
- 35 Tworzydło, W., E. Kisiel, W. Jankowska, A. Witwicka, and S.M. Bilinski. 2016. Exclusion of  
36 dysfunctional mitochondria from Balbiani body during early oogenesis of *Thermobia*.  
37 *Cell Tissue Res.* 366:191-201.
- 38 Wallace, D.C. 2005. A mitochondrial paradigm of metabolic and degenerative diseases, aging,  
39 and cancer: a dawn for evolutionary medicine. *Annu Rev Genet.* 39:359-407.
- 40 Wallace, D.C., and D. Chalkia. 2013. Mitochondrial DNA genetics and the heteroplasmy  
41 conundrum in evolution and disease. *Cold Spring Harb Perspect Biol.* 5:a021220.
- 42 Wang, Z.H., Y. Liu, V. Chaitankar, M. Pirooznia, and H. Xu. 2019. Electron transport chain  
43 biogenesis activated by a JNK-insulin-Myc relay primes mitochondrial inheritance in  
44 *Drosophila*. *Elife.* 8.

- 1 White, P.M., L.R. Serbus, A. Debec, A. Codina, W. Bray, A. Guichet, R.S. Lokey, and W. Sullivan.  
2 2017. Reliance of Wolbachia on High Rates of Host Proteolysis Revealed by a Genome-  
3 Wide RNAi Screen of *Drosophila* Cells. *Genetics*. 205:1473-1488.
- 4 Williams, C.C., C.H. Jan, and J.S. Weissman. 2014. Targeting and plasticity of mitochondrial  
5 proteins revealed by proximity-specific ribosome profiling. *Science*. 346:748-751.
- 6 Williamson, A., and R. Lehmann. 1996. Germ cell development in *Drosophila*. *Annu Rev Cell Dev*  
7 *Biol.* 12:365-391.
- 8 Zhang, Y., Y. Chen, M. Gucek, and H. Xu. 2016. The mitochondrial outer membrane protein MDI  
9 promotes local protein synthesis and mtDNA replication. *EMBO J.* 35:1045-1057.
- 10 Zhang, Y., Z.H. Wang, Y. Liu, Y. Chen, N. Sun, M. Gucek, F. Zhang, and H. Xu. 2019. PINK1 Inhibits  
11 Local Protein Synthesis to Limit Transmission of Deleterious Mitochondrial DNA  
12 Mutations. *Mol Cell.* 73:1127-1137 e1125.
- 13 Zhou, R.R., B. Wang, J. Wang, H. Schatten, and Y.Z. Zhang. 2010. Is the mitochondrial cloud the  
14 selection machinery for preferentially transmitting wild-type mtDNA between  
15 generations? Rewinding Muller's ratchet efficiently. *Curr Genet.* 56:101-107.  
16  
17

## 1 Figures and Figure Legends

2

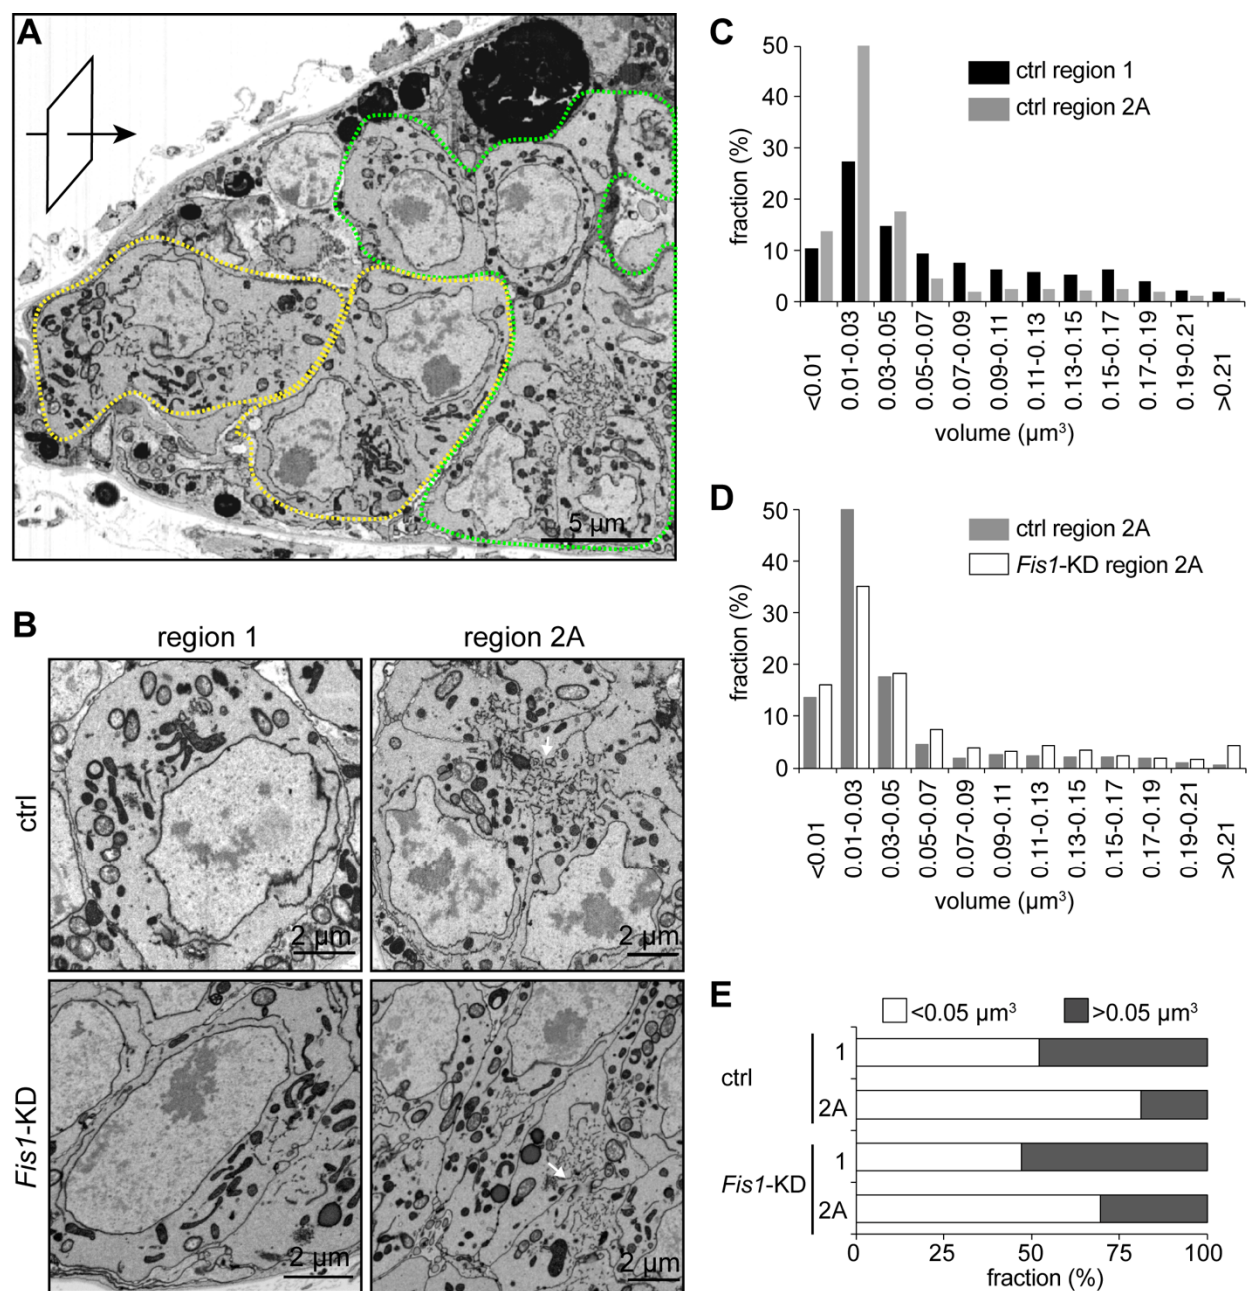

3  
4  
5 **Figure 1. FIB-SEM show mitochondrial fragmentation in *Dm* early germarium, which could be**  
6 **compromised by *Fis1* knockdown. (A)** A representative electron micrograph of wild-type early  
7 germarium obtained by FIB-SEM. Sample milling was performed from the anterior tip of the germarium  
8 towards posterior (arrow). The image is a single section of xz plane after 3D reconstruction. Region 1  
9 and region 2A cysts are outlined with yellow and green dashed lines, respectively. Scale bar, 5  $\mu\text{m}$ . **(B)**  
10 The detailed structures of mitochondria and other subcellular components in region 1 and region 2A of  
11 wild-type and *Fis1* knockdown by *bam-gal4*. The arrows point to the ring canals between the cystocytes  
12 and the fusome that extends through the ring canals, which were used to trace the germ cells within a

1 cyst. Scale bar, 2  $\mu$ m. **(C and D)** Frequency distribution of mitochondrial volume in region 1 and region  
 2 2A of wild-type gerarium **(C)**, and those in region 2A of wild-type and *Fis1* knockdown gerarium **(D)**.  
 3 The proportion of mitochondria fall to the indicated range of volume are shown. **(E)** The proportion of  
 4 mitochondria with bigger ( $> 0.05 \mu\text{m}^3$ ) volume from each experimental group.  
 5  
 6

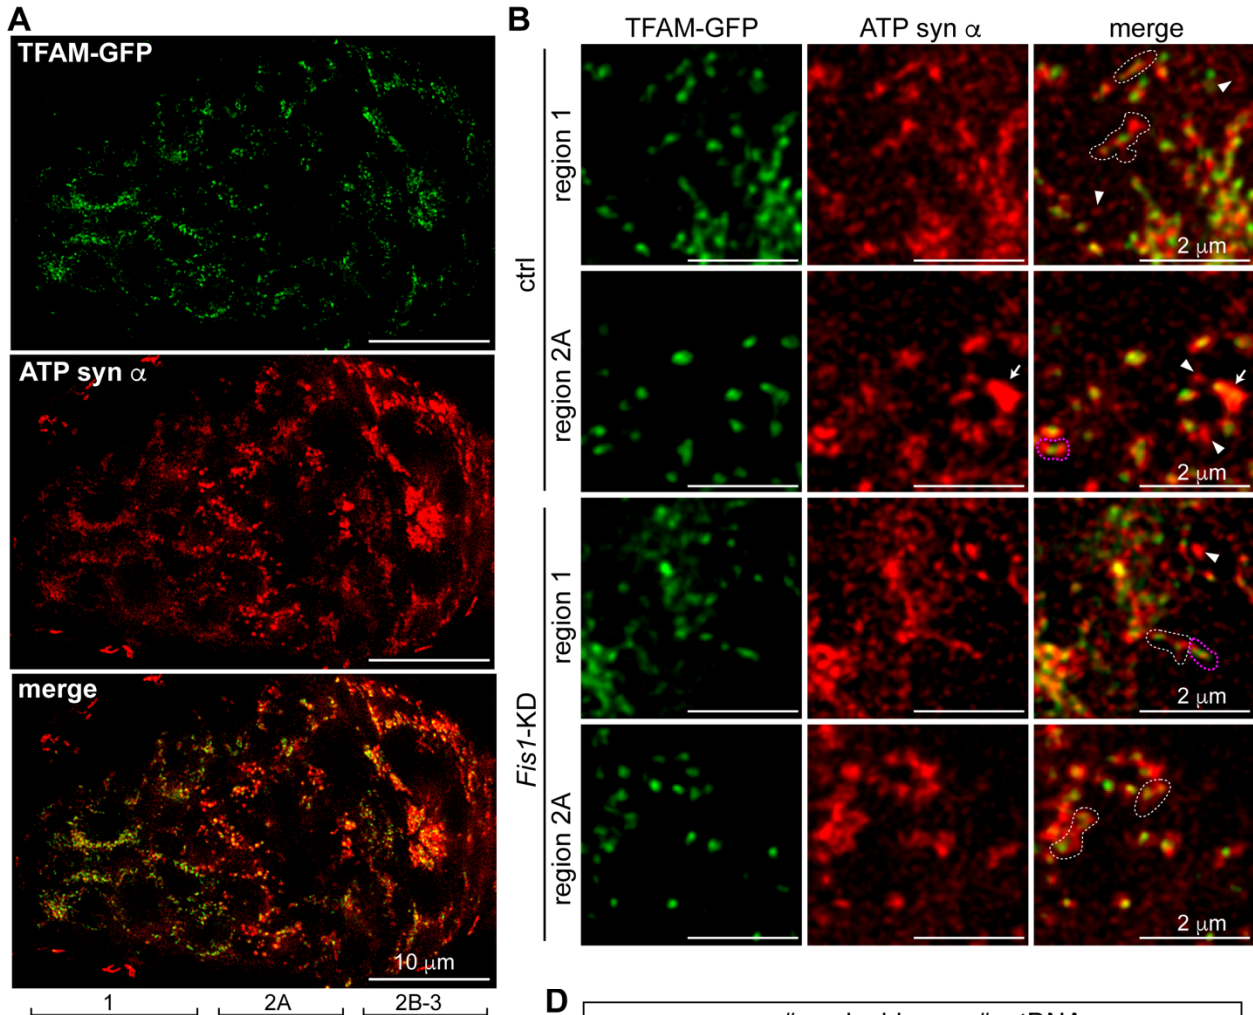

**D**

|          | # nucleoid |      | # mtDNA |      | # mtDNA / nucleoid |
|----------|------------|------|---------|------|--------------------|
|          | mean       | CV%  | mean    | CV%  |                    |
| each GSC | 79.7       | 11.3 | 108.4   | 27.4 | 1.36               |

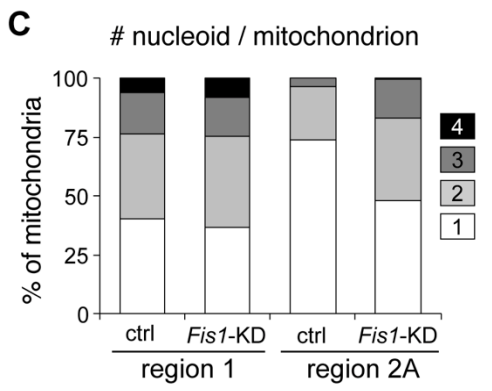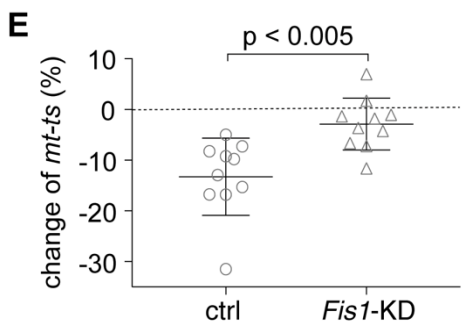

7



1 **Figure 2. Mitochondrial fragmentation and nucleoid segregation in germarium region 2A are essential**  
2 **for mtDNA selective inheritance. (A)** Mitochondria labeled by ATP synthase  $\beta$  subunit staining and  
3 mtDNA labeled by TFAM-GFP in *Drosophila* germarium. The images are representative z-stack  
4 projection (1.5  $\mu\text{m}$ ) of a germarium using stimulated emission depletion (STED) microscopy. The  
5 developmental regions of germarium are indicated. Images here and throughout are oriented with  
6 the germarium anterior towards the left. Scale bar, 10  $\mu\text{m}$ . **(B)** Mitochondrial nucleoids labeled by  
7 TFAM-GFP and mitochondria labeled by ATP synthase  $\beta$ -subunit staining in a germarium are  
8 displayed in magnified views. Both control and *Fis1* knockdown ovaries driven by *bam-gal4* are  
9 shown. The representative images of region 1 are from anterior end, where germline stem cells or  
10 cystoblasts reside. The white dashed outlines are elongated mitochondria containing multiple  
11 nucleoids. Arrowheads point to mitochondria without nucleoids. The arrow point to the clustered  
12 mitochondria, which are excluded from data analyses. The ATP synthase  $\alpha$  subunit staining were  
13 uneven, with less intensity in the regions where nucleoids are located. We defined two adjacent, but  
14 distinct ATP synthase subunit  $\alpha$  puncta as a single mitochondrion if they appeared in the same  
15 contour and were connected with one nucleoid (magenta dashed outlines). Scale bar, 2  $\mu\text{m}$ . **(C)** The  
16 number of nucleoids per mitochondrion was determined using TFAM-GFP and ATP synthase  $\beta$ -  
17 subunit staining shown in **(B)** in regions 1 (stem cells or cystoblasts) and 2A from control and *Fis1*  
18 knockdown ovaries ( $n = 10$  cysts for each group). The fraction of each group is shown. Note that the  
19 fraction of mitochondria containing multiple nucleoids was increased in region 2A of *Fis1* knockdown  
20 driven by *bam-gal4*. **(D)** Quantification of mitochondrial nucleoid number and mtDNA copy number in  
21 each germ stem cell (GSC) in germarium. CV, coefficient of variance; **(E)** Knockdown of *Fis1* in  
22 germarium region 2A, using a *bam-Gal4* driver, compromises the selection against the mutant mtDNA in  
23 heteroplasmic *mt:Col<sup>T3001</sup> Drosophila*. The proportion of mutant *ts* mtDNA in progeny is decreased by 15%  
24 compared with their mothers on average. In *Fis1* knockdown fly, this negative selection was diminished.  
25  
26  
27  
28

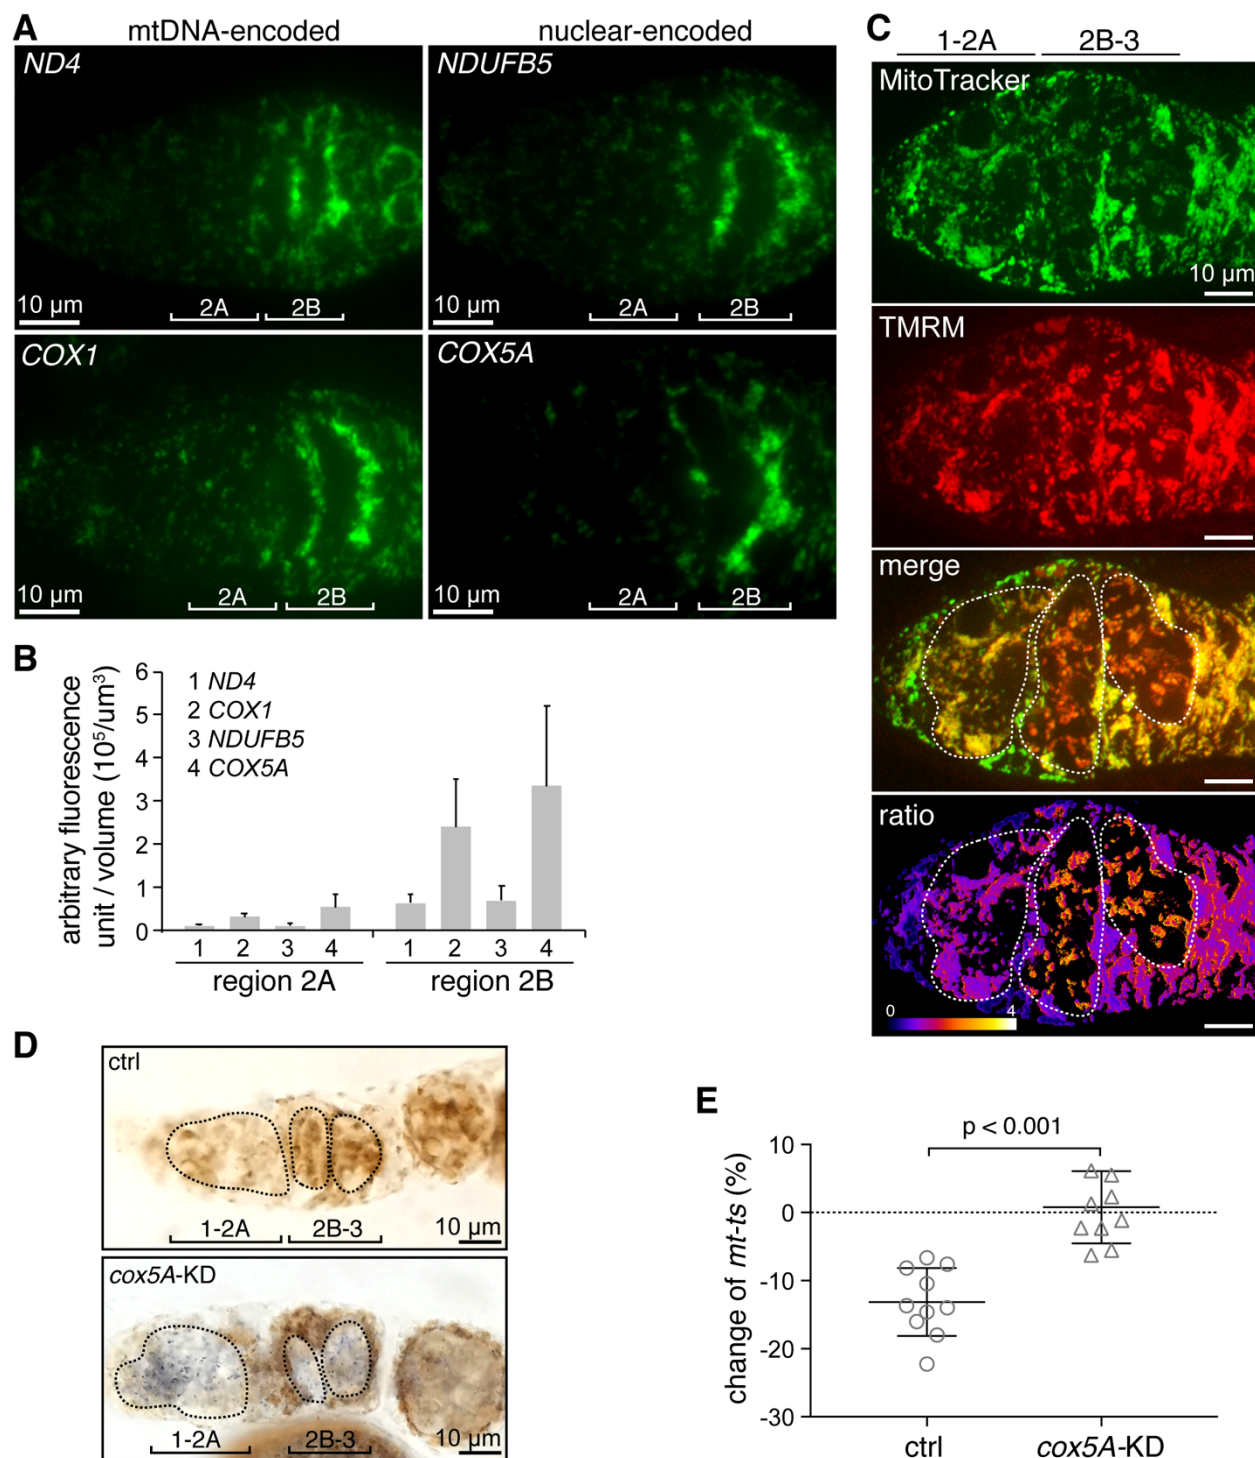

1  
2  
3 **Figure 3. Mitochondrial respiration is activated in region 2B and essential for mtDNA selective**  
4 **inheritance. (A)** Expression of mtDNA- and nuclear-encoded ETCs genes in the germarium. The spatial  
5 patterns of nuclear and mitochondrial encoded mRNAs were revealed by smFISH assay. Fluorescently  
6 labelled probes targeted mtDNA-encoded *ND4* and *cox1* transcripts, and the nuclear-encoded *NDUFB5*  
7 and *cox5A* transcripts. Scale bar, 10  $\mu$ m. **(B)** Quantification of total immunofluorescence intensity per  
8 volume in region 2A and 2B. The expression of both types of RNAs were markedly increased at region

1 2B. (C) Mitochondria membrane potential staining demonstrated by the mitochondrial membrane  
 2 potential indicator TMRM (red) and mitochondrial fluorescent dye mitoTracker (green). The strong  
 3 red signal at region 2B and 3 in merged image suggests markedly increased membrane potential. The  
 4 ratio of red to green fluorescence intensity is shown as the pseudo color ratiometric image. The  
 5 developing regions of germarium germ cells are outlined. Scale bar, 10  $\mu$ m. (D) Mitochondrial  
 6 respiratory activity in ovary using the colorimetric assay. Ovaries from control and *cox5A* knockdown  
 7 flies driven by *nanos-gal4* were stained for dual succinate dehydrogenase (complex II) and cytochrome C  
 8 oxidase (complex IV) activity. Representative images for each group are shown. Intense brown color,  
 9 indicating that both complex II and complex IV are active, was prominent in region 2B, but mostly absent  
 10 in region 1 and region 2A. The strong blue color in *cox5A* knockdown group suggests complex IV  
 11 activity was greatly reduced upon *cox5A* knockdown at all developmental stages of germarium. The  
 12 developing regions of germarium germ cells are outlined. Scale bar, 10  $\mu$ m. (E) Selection against the  
 13 deleterious mtDNA mutation (*ts*) in heteroplasmic *mt:Col<sup>T3001</sup>* *Drosophila* was compromised by  
 14 knocking down *cox5A* in the germline using *nanos-gal4* driver.  $p < 0.001$ .  
 15  
 16  
 17

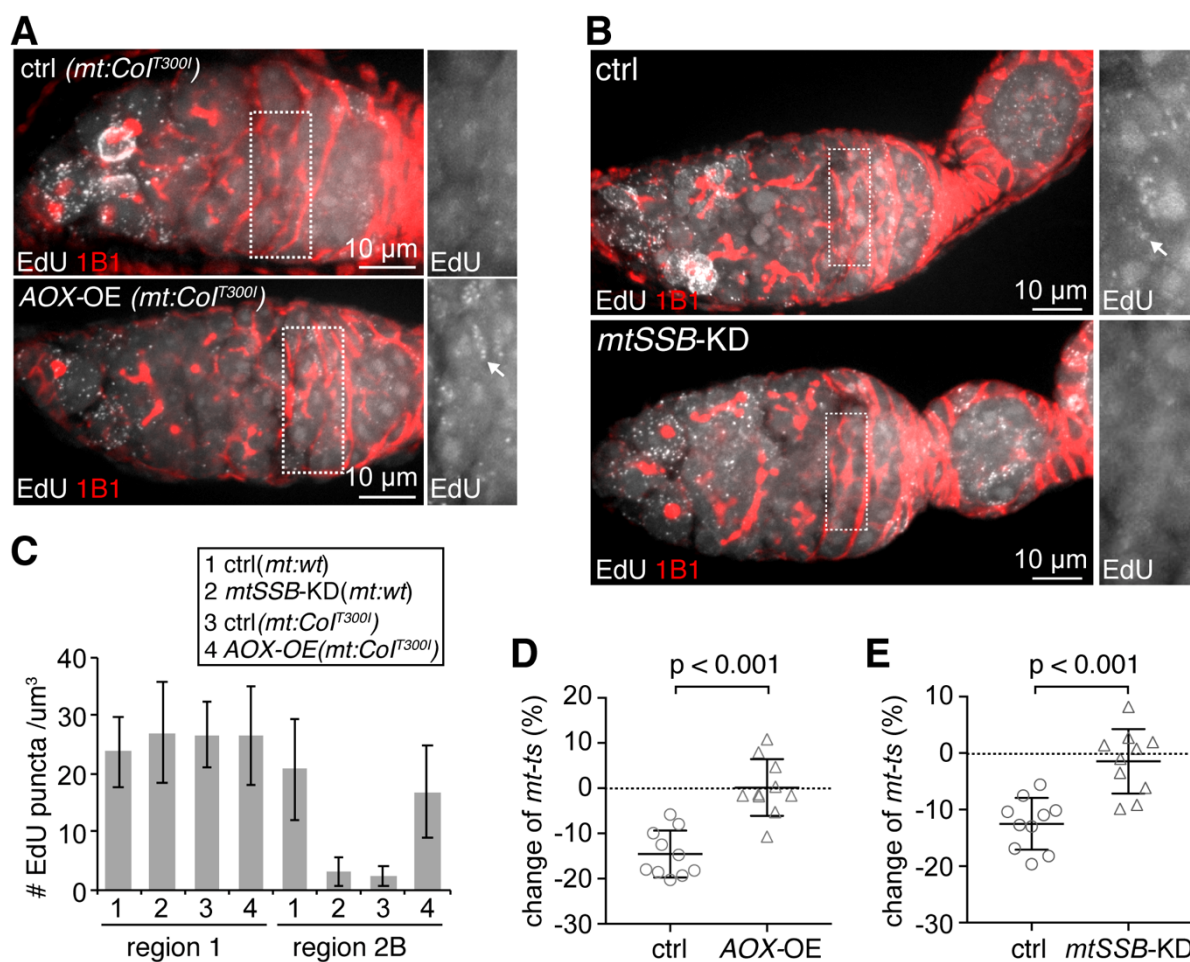

18  
 19  
 20 **Figure 4. mtDNA replication are indispensable for selective inheritance. (A and B)** mtDNA replication  
 21 labeled by EdU staining in *Drosophila* germarium. The Hts-1B1 antibody was used to stain the fusome,  
 22 which indicates the developmental stages of germarium. Region 2B is outlined in white and enlarged on

1 the right panels. Note that the mtDNA replication was specifically disrupted at region 2B in  
2 *mt:Col<sup>T3001</sup>* ovary at 29°C, but could be restored by overexpression of AOX driven by *nanos-gal4* (A).  
3 Knocking down mtSSB using *nanos-gal4* driver diminished mtDNA replication at region 2B of wild-type  
4 ovary, but not in egg chambers (B). Arrows points to the EdU puncta. Scale bar, 10 μm. (C)  
5 Quantification of mtDNA replication indicated by numbers of EdU puncta in regions 1 and 2B in genetic  
6 backgrounds shown in (A) and (B). (D and E) Selection against *ts* mtDNA at 29°C was compromised by  
7 ectopic expression of AOX (D) and knock down of *mtSSB* (E). Both lines were driven by *nanos-gal4*.  
8  $p < 0.001$ .

9  
10  
11  
12  
13

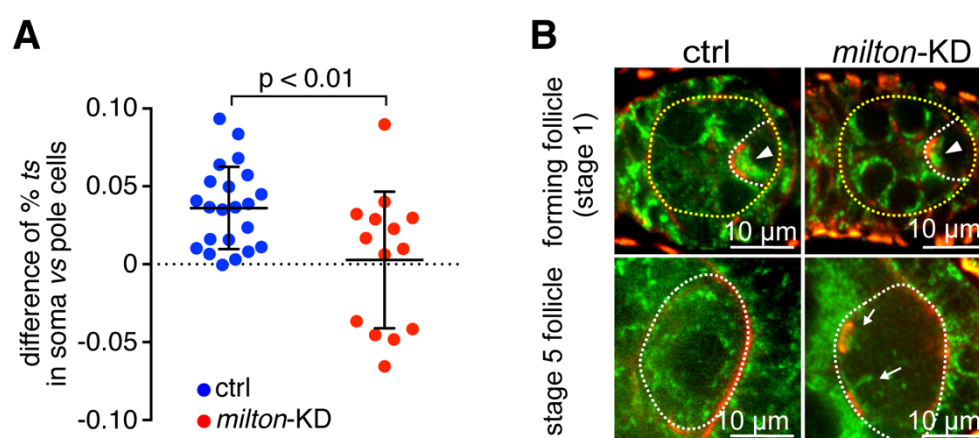

14  
15  
16  
17  
18  
19  
20  
21  
22  
23  
24  
25  
26  
27  
28  
29  
30  
31  
32  
33  
34  
35  
36

**Figure 5. Balbiani body contributes to the selection against the *mt:Col<sup>T3001</sup>* mtDNA in the germline of heteroplasmic flies. (A)** Somatic cells consistently had a higher percentage of *ts* mtDNA than germ cells (pole cells) in heteroplasmic embryos. Disrupting the Balbiani body by knocking down *milton* gene (*milton-KD*) in germ cells abolished the difference between somatic and germ cells. **(B)** Balbiani body formation was disrupted in *milton* knockdown oocytes. Mitochondria labeled by ATP synthase  $\alpha$  subunit staining (green), ring canals and other actin filaments stained by phalloidin (red) are shown. In the oocyte (white dashed outlines) of the forming follicle cyst (yellow dashed outlines), mitochondria in *milton* knockdown were less and remained at the anterior of the oocyte. A normal Balbiani body (arrowheads) could not be formed. In the oocyte (white dashed outlines) of stage 5 wild-type follicle, mitochondria were sparse and distributed evenly in cytoplasm. There were much fewer mitochondria, which located near ring canals (arrows) in *milton* knockdown oocyte. Scale bar, 10  $\mu$ m.

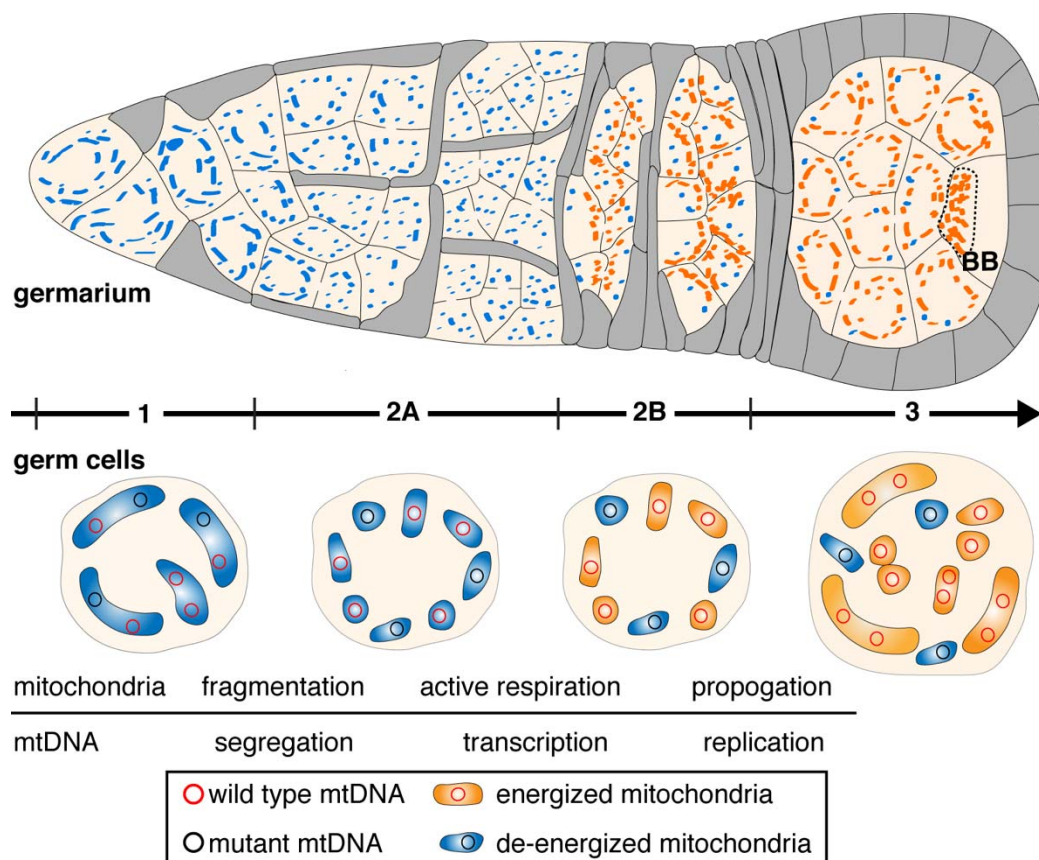

1  
2  
3 **Figure 6. Developmentally-orchestrated mitochondria and mtDNA processes in the germarium of**  
4 ***Dm* are essential to limit the transmission of deleterious mutations.** We propose that the mtDNA  
5 purifying selection is a developmentally regulated process. Mitochondrial fragmentation promotes  
6 mtDNA segregation in early germarium and prepare for effective selection on the organelle level based  
7 on the functional readout of the mtDNA within. Mitochondrial respiration is boosted in 16-cell stage  
8 region 2B, revealing the phenotype of the mtDNA and allowing selection based on mitochondrial  
9 functionality. In late germarium stage, healthy mitochondria containing wild-type mtDNA propagate  
10 much more vigorously than organelles containing deleterious mutations. These coordinated events act  
11 synergistically to secure the transmission of functional mtDNA from the female germline to the embryo.  
12 The Balbiani body (BB) in the oocyte further contributes to selective inheritance by concentrating wild-  
13 type mitochondria.  
14

1 **Supplemental Materials**

2

3 **Supplementary Tables**

4

| Volume ( $\mu\text{m}^3$ ) | ctrl     |           | <i>Fis1</i> -KD |           |
|----------------------------|----------|-----------|-----------------|-----------|
|                            | region 1 | region 2A | region 1        | region 2A |
| <0.01                      | 10.3     | 13.5      | 12.1            | 16.1      |
| 0.01-0.03                  | 27.2     | 50.0      | 19.7            | 35.1      |
| 0.03-0.05                  | 14.7     | 17.7      | 15.6            | 18.2      |
| 0.05-0.07                  | 9.4      | 4.5       | 11.4            | 7.4       |
| 0.07-0.09                  | 7.4      | 1.9       | 7.6             | 3.9       |
| 0.09-0.11                  | 6.2      | 2.4       | 5.1             | 3.2       |
| 0.11-0.13                  | 5.7      | 2.4       | 8.6             | 4.2       |
| 0.13-0.15                  | 5.2      | 2.0       | 6.9             | 3.5       |
| 0.15-0.17                  | 6.3      | 2.2       | 4.1             | 2.3       |
| 0.17-0.19                  | 3.8      | 1.8       | 2.7             | 2.0       |
| 0.19-0.21                  | 2.1      | 1.1       | 1.7             | 1.6       |
| 0.21-0.23                  | 1.2      | 0.4       | 2.5             | 1.1       |
| 0.23-0.25                  | 0.4      | 0.1       | 1.2             | 0.7       |
| 0.25-0.27                  | 0.1      | 0         | 0.4             | 0.4       |
| >0.27                      | 0        | 0         | 0.4             | 0.3       |

5

6 **Table S1.** Frequency distribution of mitochondrial volume in control and *Fis1* knockdown (driven by  
7 *bam-gal4*) germarium region 1 and region 2A. The data are percentage (%).

8

9 **Table S2.** The sequence of fluorescence *in situ* hybridization short DNA probes targeting to *ND4*, *cox1*,  
10 *NDUFB5*, *cox5A*, *Fis1*, *Drp1*, *mtSSB* mRNA.

11

12 **Video 1.** 3D FIB-SEM image stack of wild-type *Dm* early germarium with automated mitochondrial  
13 segmentation. Y-stack images are shown and time represents sequential images moving across the  
14 depth of the germarium (10 nm steps). Germline cysts are labelled with different colors.

15

16 **Video 2.** 3D FIB-SEM image stack of *Fis1* knockdown *Dm* germarium with automated mitochondrial  
17 segmentation.

18

19

20

21

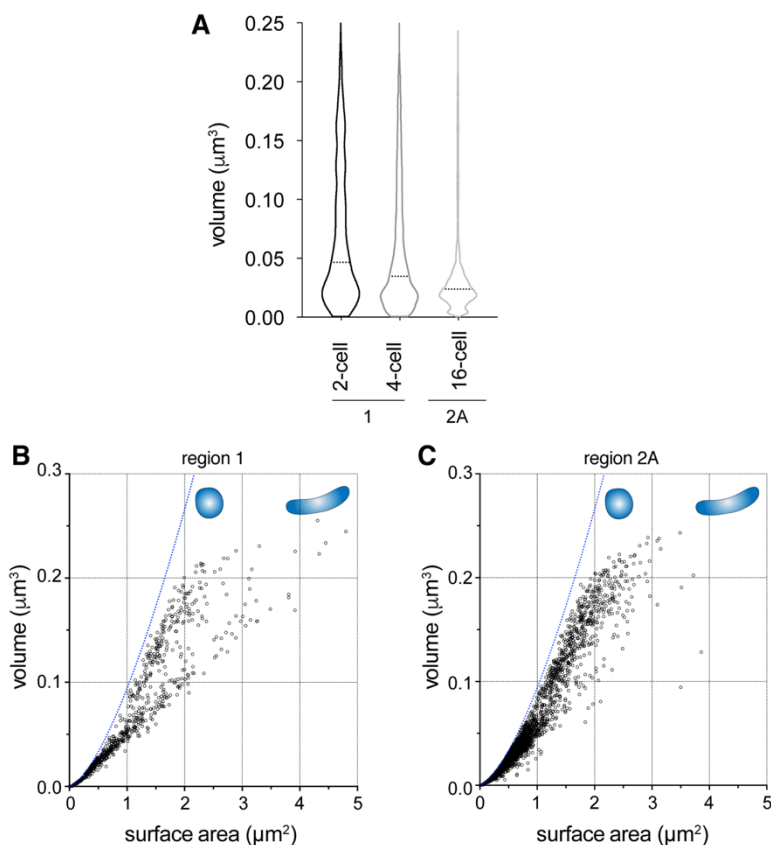

1  
2

3 **Supplementary Figure 1. FIB-SEM analyses show the change of mitochondrial volume and morphology**  
4 **in early germarium. (A)** A violin plot showing the distribution of individual mitochondrial volume in  
5 germarium 2-cell, 4-cell and 16 cell cysts. The dashed lines indicate the median volume. **(B and C)**, The  
6 volume ( $V$ ) versus surface area ( $SA$ ) of each mitochondrion from region 1 **(B)** and region 2A **(C)** in wild-  
7 type ovaries. The dashed blue lines represent the relationship between  $V$  and  $SA$  of perfect spheres,  
8 which have the lowest  $SA/V$  ratio among all shapes. For a given volume, the lower  $SA/V$  suggests more  
9 rounded shape. Please be noted that more mitochondria in region 2A shift towards the blue line,  
10 compared with those in 2-cell cyst at region 1.

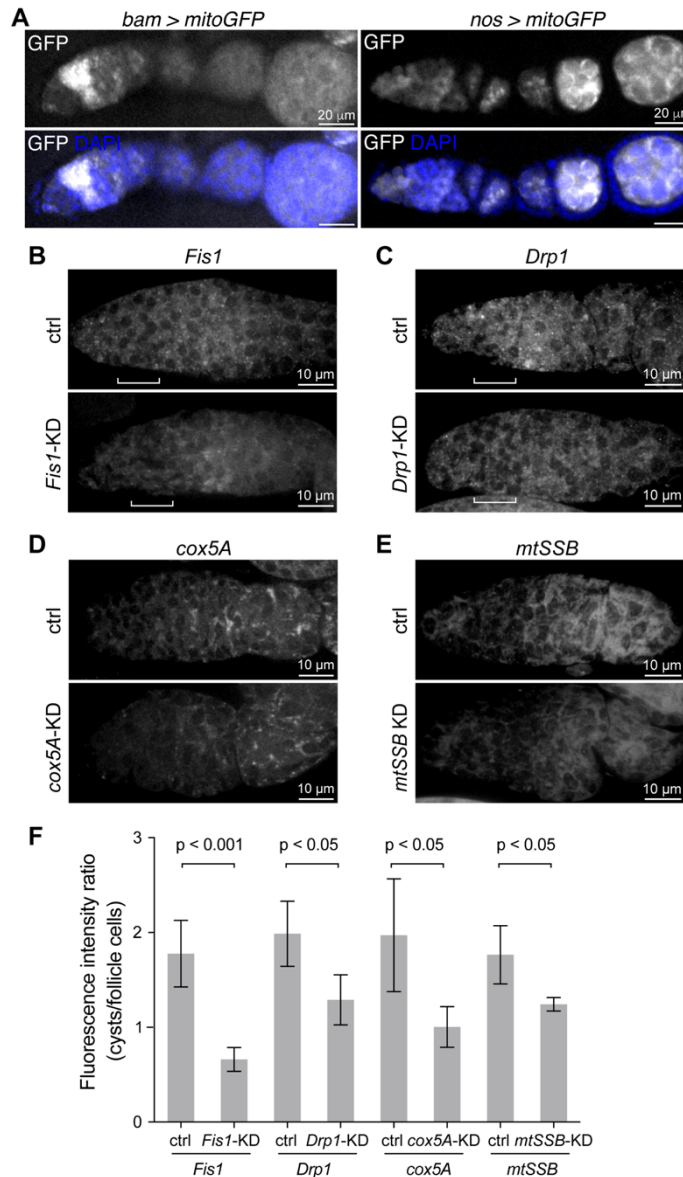

1  
2 **Supplementary Figure 2. Expression pattern of germline specific drivers and FISH assay. (A)** Expression  
3 pattern of mitochondrially-targeted GFP (mtGFP) driven by *bam-gal4* and *nanos-gal4* drivers. Note the  
4 high expression level of mtGFP in dividing cysts driven by *bam-gal4*. Ovaries are co-stained with DAPI  
5 (blue). Scale bar, 20  $\mu$ m. **(B-E)** smFISH assay show the knockdown efficiency of several RNAi lines used in  
6 this work. The images are smFISH using DNA probes targeted to *Fis1* **(B)**, *Drp1* **(C)**, *cox5A* **(D)**, *mtSSB* **(E)**  
7 RNA in ovaries. Brackets in **(B)** and **(C)** indicate region 2A. Scale bar, 10  $\mu$ m. **(F)** Quantification of the  
8 smFISH fluorescence intensity in germline cysts using region 2B follicle cells of the same sample as the  
9 internal control. The ratio of the fluorescence intensity in germline cysts to follicle cells are shown.  
10



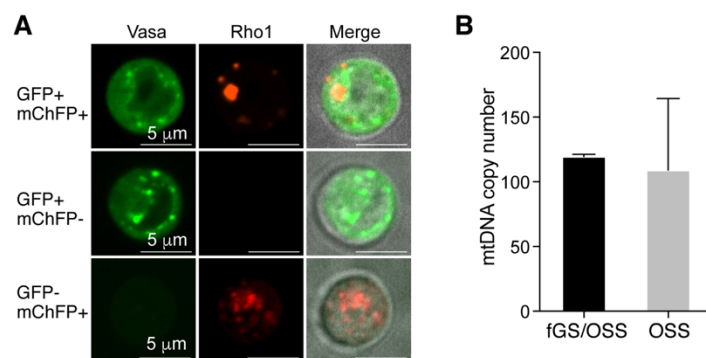

1  
2  
3 **Supplementary Figure 3. Quantification of mtDNA copy number in GSCs.** (A) Confocal imaging of cells  
4 isolated from a mix of female Rho1-mChFP/X; Vasa-GFP/+ and male Y/X; Vasa-GFP/+ early pupae  
5 using FACS. The germ cells of the female pupae carry both GFP and mChFP fluorescence. The merged  
6 images are overlay of GFP and mChFP fluorescence with DIC channel. Scale bar, 5  $\mu$ m. (B) mtDNA copy  
7 number per cell in fGS/OSS (the mixture of female germline stem cell and ovarian somatic sheath cells)  
8 and OSS (ovarian somatic sheath) cells quantified by real time PCR. The average copy number of  
9 mtDNA in fGS/OSS are 119.5 and 109, respectively. Thus, we deduce the mtDNA number in fGS alone  
10 should be similar to that of fGS/OSS.

11  
12

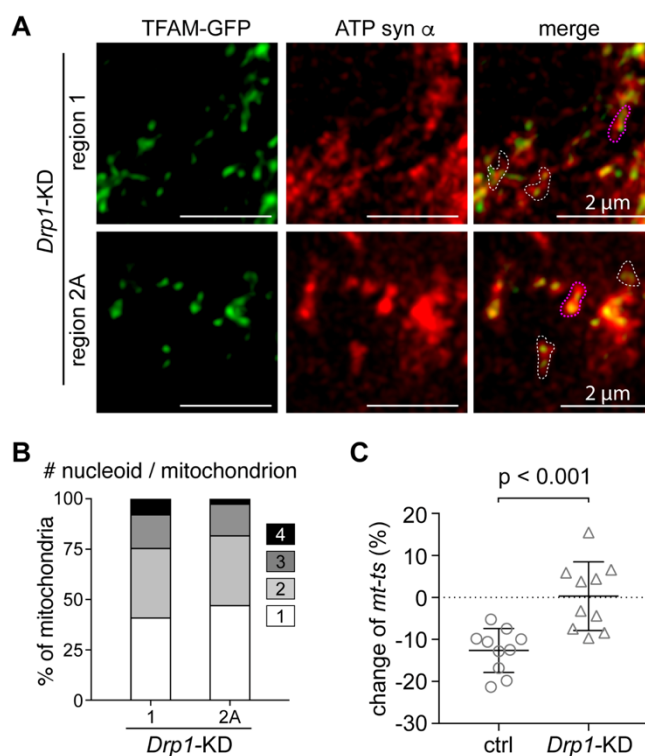

13  
14  
15 **Supplementary Figure 4. *Drp1* knockdown impairs nucleoid segregation and mtDNA selective**  
16 **inheritance.** (A) Representative images of the anterior end of region 1 and region 2A in a *Drp1*

1 knockdown germarium (driven by *bam-gal4*) labeled with TFAM-GFP and ATP synthase  $\beta$ -subunit. An  
 2 object with continuous ATP synthase  $\beta$ -subunit staining was defined as a single mitochondrion (white  
 3 dashed lines). Two adjacent, but distinct ATP synthase subunit  $\alpha$  puncta were also called as a single  
 4 mitochondrion if they appeared in the same contour and were connected with one nucleoid  
 5 (magenta dashed lines). Scale bar, 2  $\mu$ m. **(B)** The number of nucleoids per mitochondrion was  
 6 determined by counting the number of TFAM-GFP puncta within a single mitochondrion shown in **(A)**  
 7 in regions 1 (stem cells or cystoblasts) and 2A from *Drp1* knockdown ovaries. The fraction of each  
 8 group is shown (n = 10 cysts for each group). **(C)** Knockdown of *Drp1* using *bam-gal4* driver diminishes  
 9 the selection against the *ts* mtDNA in heteroplasmic *mt:Col<sup>T3001</sup> Drosophila* ( $p < 0.001$ ).

10  
 11

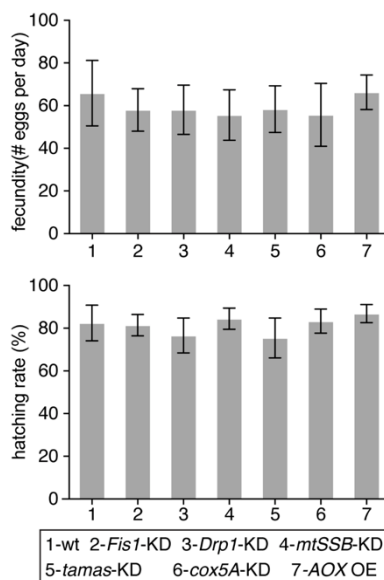

12  
 13  
 14 **Supplementary Figure 5. *Drosophila* fecundity and hatching rate.** The fecundity and hatching rate of  
 15 their progeny in *Fis1*, *Drp1* knockdown (driven by *bam-gal4*), *cox5A*, *mtSSB*, *tamas* knockdown (driven  
 16 by *nanos-gal4*), and the AOX ectopic expression (driven by *nanos-gal4*) flies are comparable with those  
 17 in wild-type flies.

18  
 19

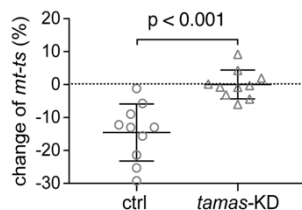

20  
 21 **Supplementary Figure 6. Knockdown of *tamas* in ovary diminished mtDNA selection.** Knockdown of  
 22 *tamas* using *nanos-gal4* driver diminishes the selection against the *ts* mtDNA in heteroplasmic *mt:Col<sup>T3001</sup>*  
 23 *Drosophila* ( $p < 0.001$ ).
